# Supplementary material for: Noble metal-p-block-element intermetallics with d–p orbital hybridization for highly efficient electrocatalysis
Source: Royal Society of Chemistry journal article supplement (doi:10.1039/d5mh01569c), 2025-12-13
Supplement: d5mh01569c1.pdf [file d5mh01569c1.pdf]

Electronic Supplementary Information

## **Noble Metal-P-Block-Element Intermetallics with d-p Orbital Hybridization for Highly Efficient Electrocatalysis**

Caihong He,<sup>‡ab</sup> Chaoqun Ma,<sup>‡ab</sup> Qinbai Yun,<sup>‡c</sup> Jing Xia,<sup>\*d</sup> Sumei Han,<sup>ab</sup> Huaifang Zhang,<sup>ab</sup> Xiao Ma,<sup>ab</sup> Fukai Feng,<sup>ab</sup> Gang Lin,<sup>ab</sup> Jianing Song,<sup>ab</sup> Bin Li,<sup>a</sup> Lijie Zhu,<sup>\*e</sup> An-Liang Wang,<sup>f</sup> Xiangmin Meng,<sup>d</sup> Wenbin Cao,<sup>a</sup> Qipeng Lu <sup>\*abg</sup>

<sup>a</sup> State Key Laboratory of Nuclear Power Safety Technology and Equipment, University of Science and Technology Beijing, Beijing, 100083, China

<sup>b</sup> School of Materials Science and Engineering, University of Science and Technology Beijing, Beijing 100083, China

<sup>c</sup> Department of Chemical and Biological Engineering & Energy Institute, The Hong Kong University of Science and Technology, Hong Kong, China

<sup>d</sup> Key Laboratory of Photochemical Conversion and Optoelectronic Materials, Technical Institute of Physics and Chemistry, Chinese Academy of Sciences, Beijing 100190, China

<sup>e</sup> School of Instrument Science and Opto-Electronics Engineering, Beijing Information Science and Technology University, Beijing 100192, China.

<sup>f</sup> School of Chemistry and Chemical Engineering, Shandong University, Jinan 250100, China

<sup>g</sup> Shunde Innovation School, University of Science and Technology Beijing, Foshan 528399, China

<sup>‡</sup>These authors contributed equally to this work.

\*Corresponding author. Email: xiajing@mail.ipc.ac.cn; ljzhu@bistu.edu.cn; qipeng@ustb.edu.cn;

## Experimental section

**Reagents and Chemicals.** Iridium (III) chloride hydrate ( $\text{IrCl}_3 \cdot x\text{H}_2\text{O}$ ), tin(II) chloride dihydrate ( $\text{SnCl}_2 \cdot 2\text{H}_2\text{O}$ ), silver nitrate ( $\text{AgNO}_3$ ), ruthenium chloride hydrate ( $\text{RuCl}_3 \cdot x\text{H}_2\text{O}$ ), gold chloride trihydrate ( $\text{HAuCl}_4 \cdot 3\text{H}_2\text{O}$ ), potassium tetrachloropalladate (II) ( $\text{K}_2\text{PdCl}_4$ ) and chloroplatinic acid hexahydrate ( $\text{H}_2\text{PtCl}_6 \cdot 6\text{H}_2\text{O}$ ) are bought from Aladdin Co., Ltd (Shanghai, China). Indium nitrate hydrate ( $\text{In}(\text{NO}_3)_3 \cdot x\text{H}_2\text{O}$ ) and cyanamide ( $\text{CH}_2\text{N}_2$ ) are purchased from Macklin Biochemical Co., Ltd (Shanghai, China). Ketjen Black EC300J is purchased from Suzhou Sinero Technology co., Ltd. All chemicals are used as received without further purification. Deionized water ( $18 \text{ M}\Omega \text{ cm}^{-1}$ ) used for the whole experiment is obtained by reverse osmosis pure water equipment (Sihai Water Treatment Equipment Co., Ltd., Shandong, China).

## Material synthesis

**Synthesis of Sn and In-based noble metal IMCs supported on commercial carbon.** A mixture of noble metal precursors, p-block elemental precursors and 0.06 g of carbon support (Ketjen Black EC300J) is ground using an agate mortar and pestle. The molar ratios of the noble metals and p-block element precursors are stoichiometric moles except for  $\text{Ir}_3\text{Sn}_7/\text{C}$  with a mole ratio of 1:2. The sample is sufficiently ground under ambient conditions, directly transferred to a porcelain boat and placed in a tube furnace. It is subsequently heated to  $900^\circ\text{C}$  at a rate of  $5^\circ\text{C min}^{-1}$  under a flowing  $\text{H}_2/\text{Ar}$  (5 vol.%  $\text{H}_2$ ) atmosphere and held at this temperature for 12 h, followed by cooling down to room temperature. The prepared product is treated with 0.5 M  $\text{H}_2\text{SO}_4$  at room temperature to remove the oxides.

**Synthesis of Ir/C.** Ir/C is prepared using the same method as  $\text{Ir}_3\text{Sn}_7/\text{C}$ , but without adding  $\text{SnCl}_2 \cdot 2\text{H}_2\text{O}$ .

**Synthesis of Sn/C.** Sn/C is synthesized using the same method as  $\text{Ir}_3\text{Sn}_7/\text{C}$ , but without adding  $\text{IrCl}_3 \cdot x\text{H}_2\text{O}$ .

## Physicochemical characterizations

X-ray powder diffraction (XRD) patterns are collected on a Bruker D8 X-ray diffractometer operating at 40 kV and 40 mA with Cu K $\alpha$  radiation ( $\lambda = 0.154$  nm). The patterns of all the samples are analyzed to  $2\theta$  ranging from  $10^\circ$  to  $90^\circ$  at a scan rate of  $5^\circ \text{ min}^{-1}$ . For atomic-level characterization of the Ir<sub>3</sub>Sn<sub>7</sub>/C, aberration-corrected HAADF-STEM images, elemental mapping images as well as energy-dispersive X-ray spectroscopy (EDS) are performed by using an aberration-corrected JEOL JEM-ARM300F Grand ARM transmission electron microscope operated at 300 kV accelerating voltage equipped with a cold field-emission electron gun and SDD-type EDX detectors. Transmission electron microscopy (TEM) images and selected area electron diffraction (SAED) patterns are obtained using JEOL JEM-2100F transmission electron microscopy at a voltage of 200 kV. Thermogravimetric analysis (TGA) is implemented on a Netzsch STA449C thermal analyzer under a flowing air atmosphere with a heating rate of  $10^\circ \text{ C min}^{-1}$ . For the Ir<sub>3</sub>Sn<sub>7</sub>/C and Ir/C catalysts, the TGA is carried out at  $800^\circ \text{ C}$  in the air to burn off the carbon and form a mixture of IrO<sub>2</sub> and SnO<sub>2</sub>, which are characterized by using XRD. The TGA and XRD results are used to determine the Ir content of the catalysts. The X-ray photoelectron spectroscopy (XPS) analyses with Al K $\alpha$  radiation source are acquired using on a Thermo Scientific ESCALAB 250Xi spectrometer. And the C 1s value is set at 284.8 eV for calibration. X-ray absorption spectroscopy (XAS) experiments are performed at the BL14W1 station at the Shanghai Synchrotron Radiation Facility (SSRF) in China. Quantitative analysis of metal contents is conducted by inductively coupled plasma mass spectrometry (ICP-MS) on an Agilent 7800.

## Electrochemical measurements

***The preparation of the working electrode.*** The hydrogen evolution reaction (HER) and oxygen evolution reaction (OER) measurements are conducted using a three-electrode cell system with a glassy carbon electrode (GCE) (diameter: 3 mm; area:  $0.0706 \text{ cm}^2$ ) as the working electrode,

a saturated calomel electrode (SCE) as the reference electrode, and a graphite rod as the counter electrode.

To prepare the working electrode, the inks of different electrocatalysts are prepared by sonicating the mixture of a certain amount of the catalyst powder with 950  $\mu\text{L}$  ethanol and 50  $\mu\text{L}$  Nafion for 2 h. Then 10  $\mu\text{L}$  of ink is dropped onto a cleaned GCE and dried naturally. The loading of metal (Ir or Pt) on the working electrode is 5.0  $\mu\text{g}$  for both HER and OER.

Linear-sweep voltammograms measurements are carried out to study the catalytic activity. HER and OER polarization curves are recorded at a scan rate of 5  $\text{mV s}^{-1}$  with manually 90%  $iR$ -corrected after the activation process of catalysts in 1.0 M KOH and 0.5 M  $\text{H}_2\text{SO}_4$  solutions, respectively. Cyclic voltammogram (CV) curves are conducted with different rates from 20 to 120  $\text{mV s}^{-1}$  in the non-Faraday potential region to determine double-layer capacitance. The electrochemical impedance spectroscopy (EIS) measurements are performed with a frequency range from 100 kHz to 0.01 Hz. The potential cycling stability test for HER is examined by taking continuous CVs at a sweep rate of 100  $\text{mV s}^{-1}$  over a potential range of -0.2 to 0.0 V for 10,000 cycles. Similarly, the stability of OER is examined at a potential range of 1.4 to 1.6 V, using a sweep rate of 100  $\text{mV s}^{-1}$  for 5,000 cycles.

***Electrocatalytic overall water splitting performances.*** For overall water splitting, the measurements are performed in a two-electrode system.  $\text{Ir}_3\text{Sn}_7/\text{C}$  modified carbon paper with a geometric area of 1  $\text{cm} \times 1 \text{ cm}$  is used as both cathode and anode ( $\text{Ir}_3\text{Sn}_7/\text{C}||\text{Ir}_3\text{Sn}_7/\text{C}$ ). The polarization curves are measured in different electrolytes (i.e., 1.0 M KOH, 0.5 M  $\text{H}_2\text{SO}_4$ ) at a scan rate of 5  $\text{mV s}^{-1}$ . Commercial  $\text{Pt}/\text{C} || \text{IrO}_2$  couple is measured for comparison. The long-term durability of overall water splitting is measured by using the chronopotentiometry method (CP), recording at 10  $\text{mA cm}^{-2}$  in 1.0 M KOH solutions. All recorded related potentials are transformed to the reversible hydrogen electrode (RHE) according to the following formula:  
$$E_{\text{RHE}} = E_{\text{SCE}} + 0.059 \text{ pH} + 0.241.$$

**Anion exchange membrane (AEM) water electrolyzer tests.** Ir<sub>3</sub>Sn<sub>7</sub>/C ink is dropped onto carbon paper to form the cathode and anode, respectively. The cathode and the anode were sandwiched with an anion exchange membrane (Fumasep FAA-3-50) to form the membrane electrode assembly (MEA). The polarization curve and stability test were performed in a flowing 1.0 M KOH at 50 °C.

### Computational methods and details

Density functional theory (DFT) calculations are carried out by the Vienna *ab-initio* Simulation Package (VASP) software, using the Perdew-Burke-Ernzerhof (PBE) and generalized gradient approximation (GGA) exchange-correlation function.<sup>1-4</sup> The projector augmented wave (PAW) method is used for the ion-electron interaction.<sup>5</sup> Additionally, the DFT-D3 method is employed for model van der Waals force correction. A plane-wave cutoff energy basis is set to 500 eV, and a Monkhorst-Pack k-point mesh with dimensions of 3×3×1 is utilized during the structure optimization process for all samples.<sup>6, 7</sup> The energy difference within 10<sup>-5</sup> eV and a force convergence threshold of 0.05 eV Å<sup>-1</sup> are chosen. Additionally, all periodic slabs have a vacuum layer of at least 15 Å.

The surface energy of Ir<sub>3</sub>Sn<sub>7</sub> IMCs can be computed using the following Equation (1).

$$\Delta E_{\text{surface}} = (E_{\text{surface}} - E_{\text{bulk}})/2A \quad (1)$$

In this equation,  $\Delta E_{\text{surface}}$ ,  $E_{\text{surface}}$ ,  $E_{\text{bulk}}$  and A represent the theoretical surface energy, total energy of the surface model in VASP, energy of each atom in the bulk model and surface area, respectively.<sup>8</sup>

The free energy change ( $\Delta G$ ) of each elementary reaction can be computed by the following Equation (2):

$$\Delta G = \Delta E + \Delta ZPE - T\Delta S \quad (2)$$

In this equation,  $\Delta E$ ,  $\Delta ZPE$ , T and  $\Delta S$  represent reaction energy difference, zero-point energy change, temperature, and entropy change, respectively

## Supporting Figures

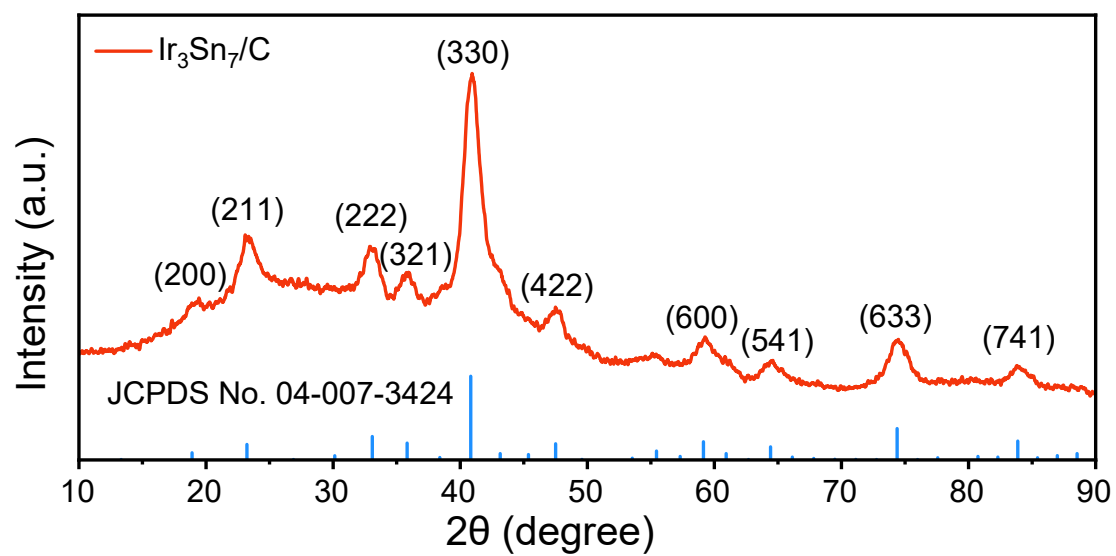

**Fig. S1.** XRD pattern of  $\text{Ir}_3\text{Sn}_7/\text{C}$ .

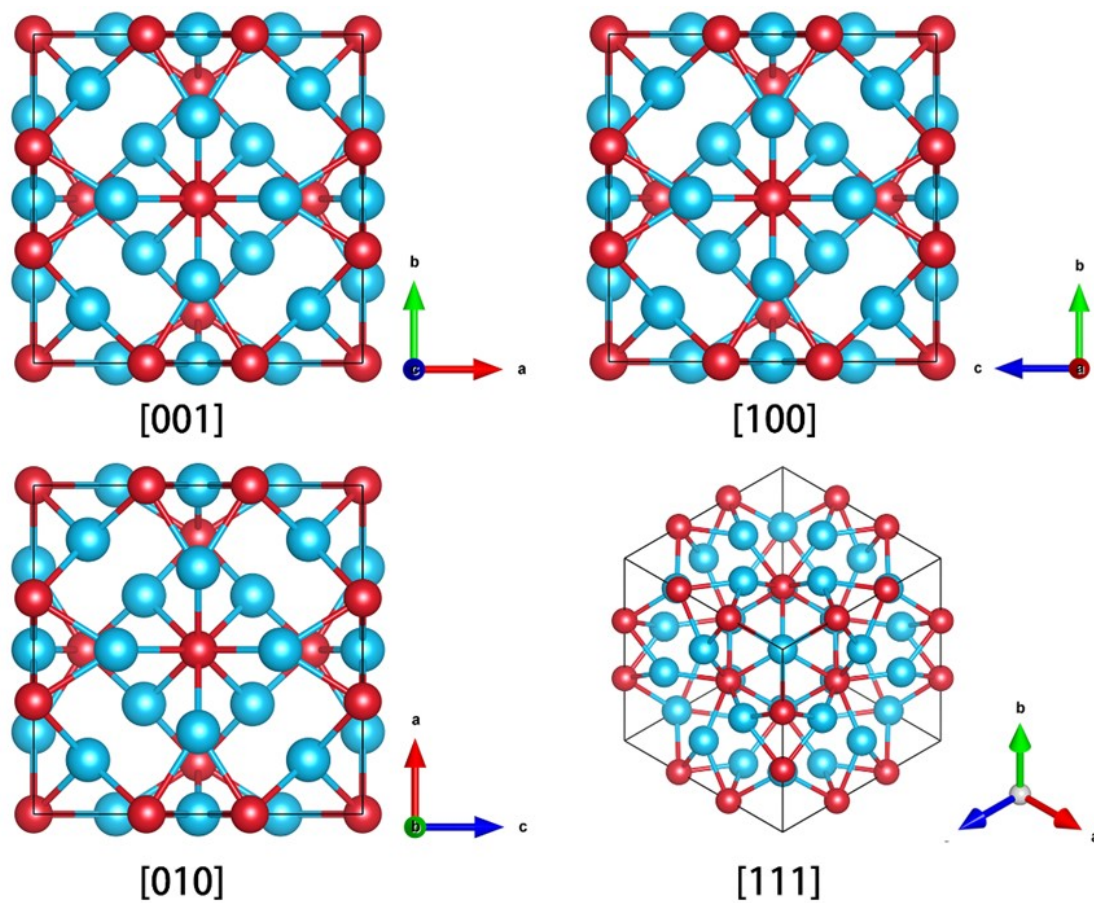

**Fig. S2.** The crystal structure of  $\text{Ir}_3\text{Sn}_7$ , viewed from [001], [100], [010] and [111] directions, respectively. The red and cyan spheres represent Ir and Sn atoms, respectively.

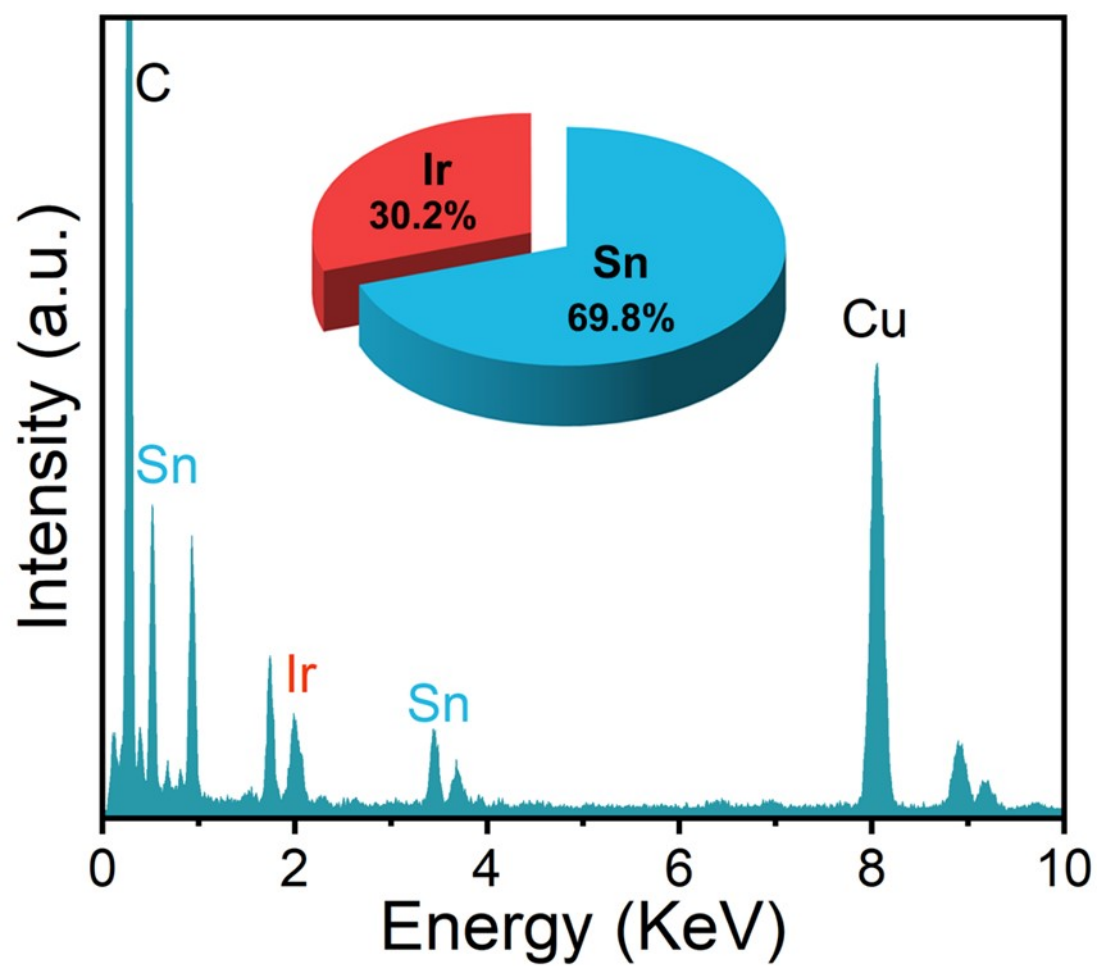

**Fig. S3.** EDS spectrum of the synthesized  $\text{Ir}_3\text{Sn}_7/\text{C}$ .



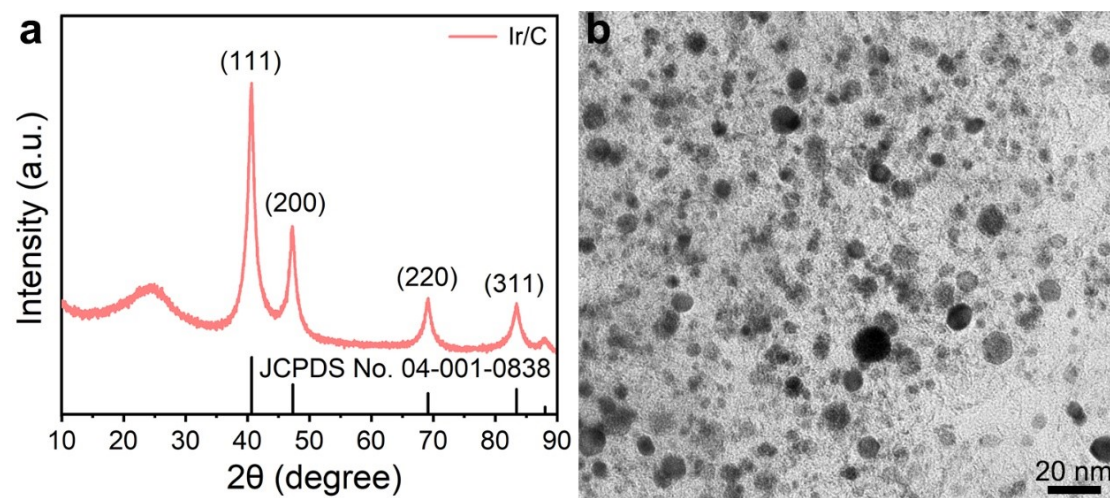

**Fig. S4.** (a) XRD pattern and (b) Low-magnification TEM image of Ir/C.

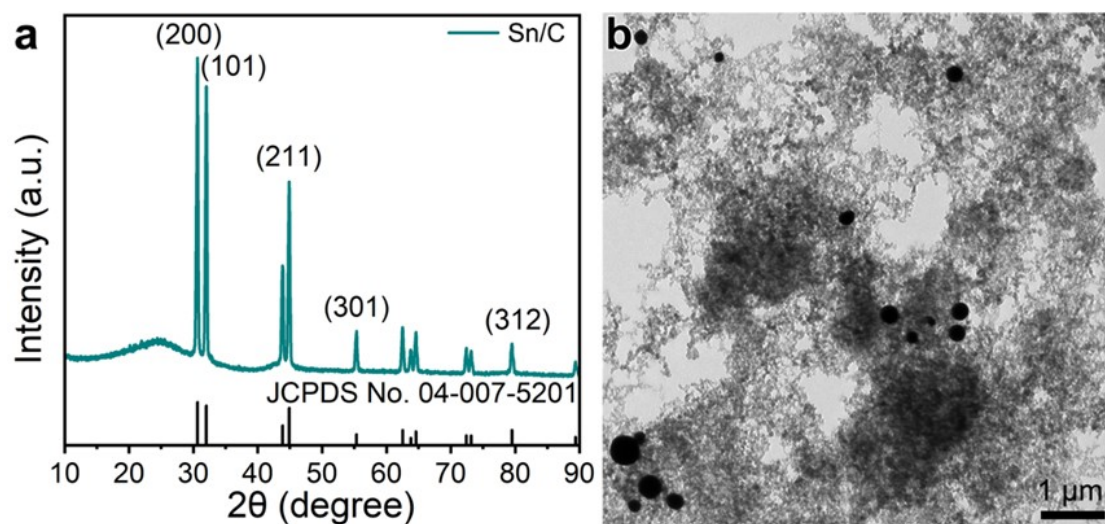

**Fig. S5.** (a) XRD pattern and (b) Low-magnification TEM image of Sn/C.

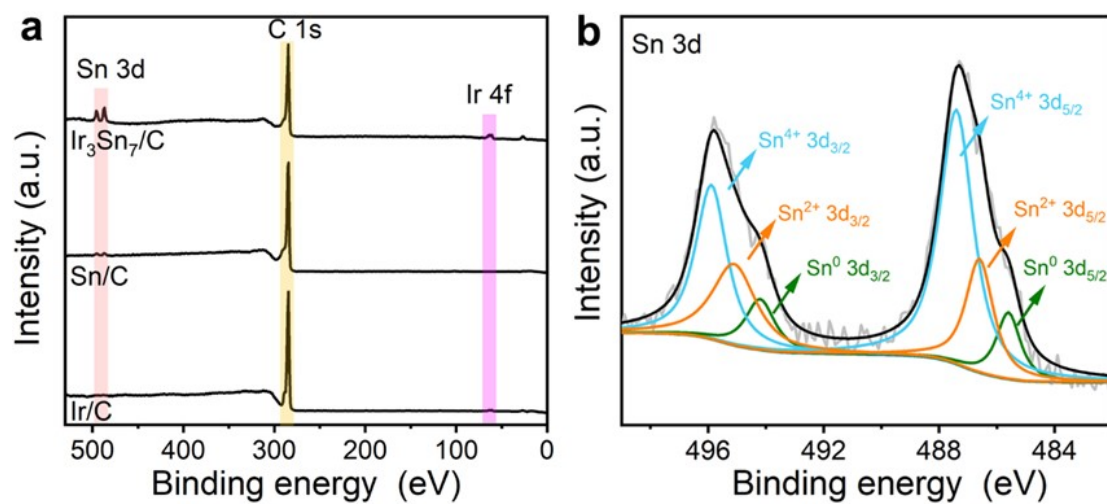

**Fig. S6.** (a) Full XPS spectra of  $\text{Ir}_3\text{Sn}_7/\text{C}$ ,  $\text{Ir}/\text{C}$  and  $\text{Sn}/\text{C}$ . (b) High-resolution Sn 3d XPS spectrum of  $\text{Ir}_3\text{Sn}_7/\text{C}$ .

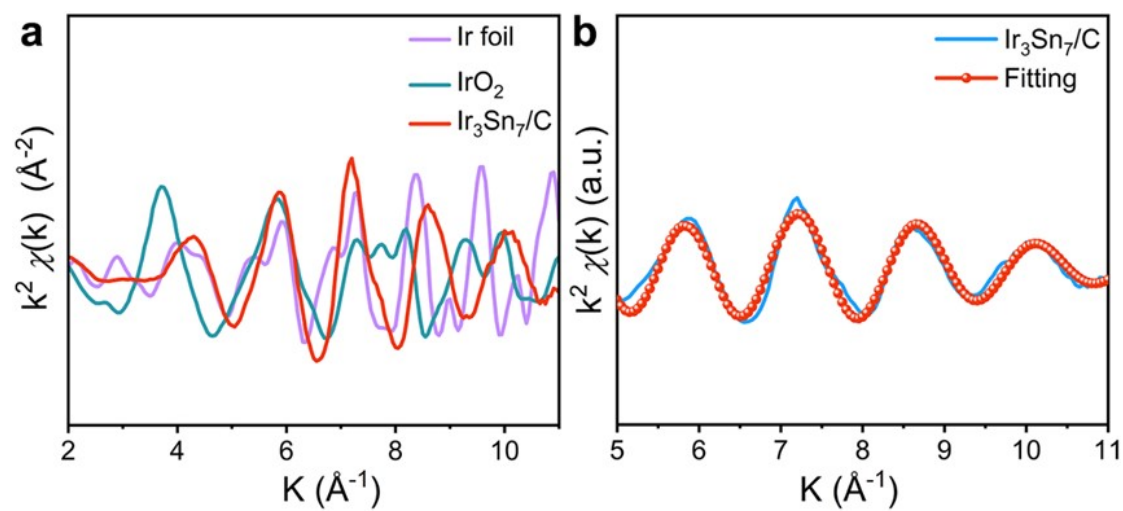

**Fig. S7.** (a) EXAFS oscillation functions at the Ir L<sub>3</sub>-edge of Ir<sub>3</sub>Sn<sub>7</sub>, Ir foil and IrO<sub>2</sub>, respectively. (b) EXAFS oscillation function and fitting curve at the Ir L<sub>3</sub>-edge of Ir<sub>3</sub>Sn<sub>7</sub>/C.

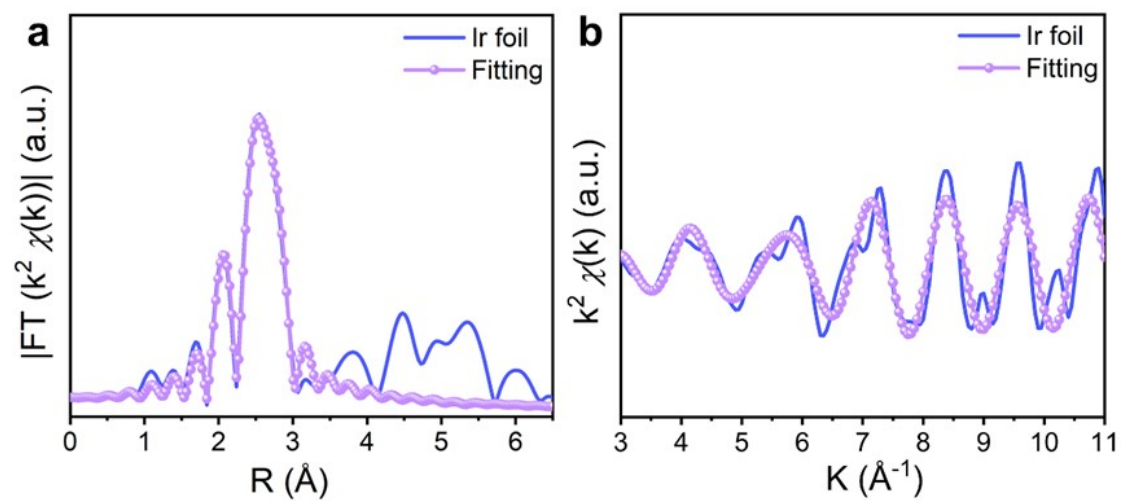

**Fig. S8.** EXAFS fitting curves of Ir foil at the (a) R space and (b) k space, respectively.

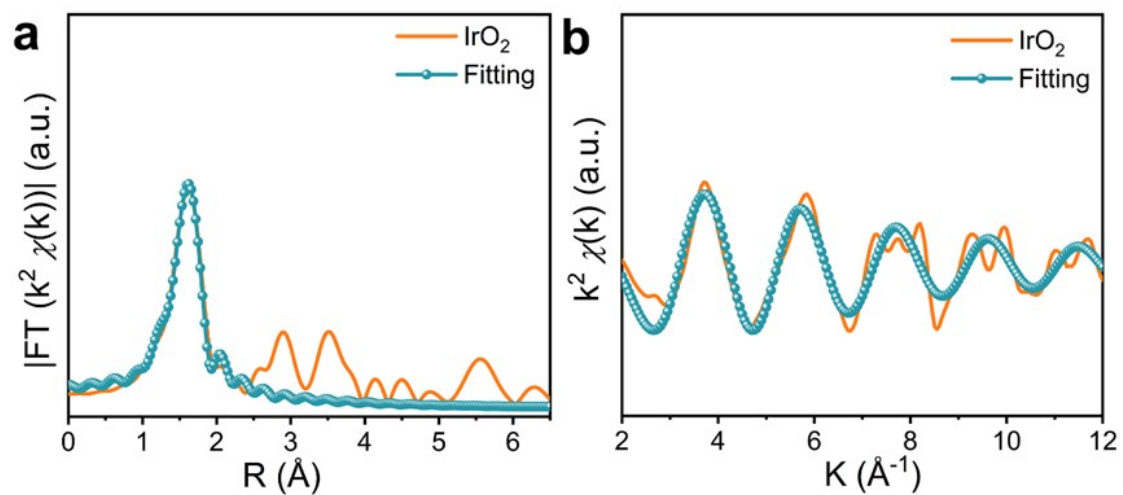

**Fig. S9.** EXAFS fitting curves of  $\text{IrO}_2$  at the (a) R space and (b) k space, respectively.

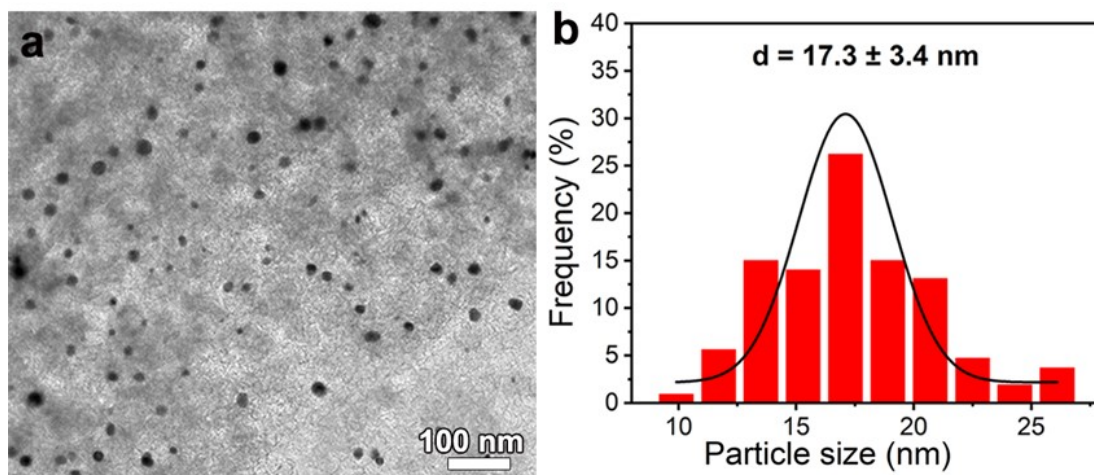

**Fig. S10.** (a) TEM image of Ru<sub>3</sub>Sn<sub>7</sub>/C and (b) the particle size distribution of Ru<sub>3</sub>Sn<sub>7</sub> IMCs.

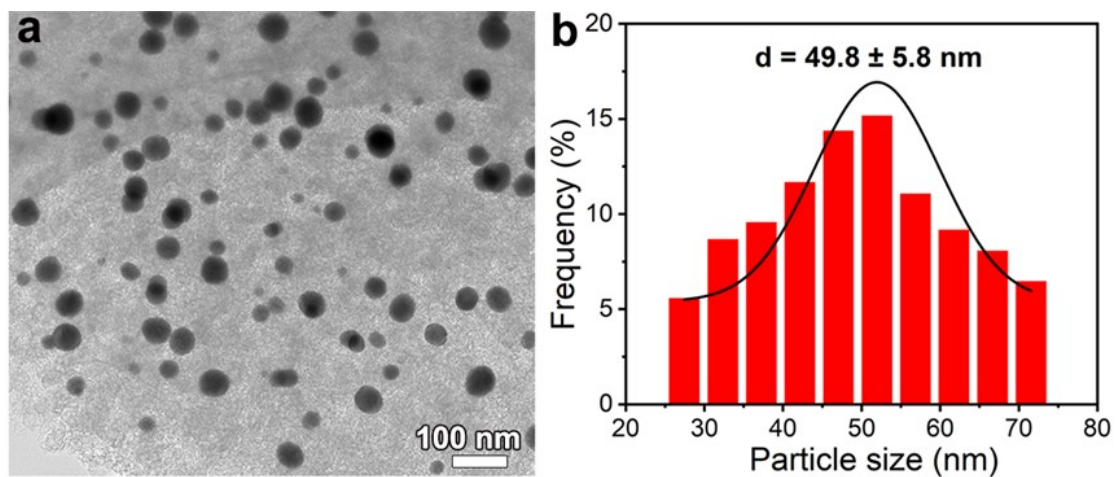

**Fig. S11.** (a) TEM image of AuSn/C and (b) the particle size distribution of AuSn IMCs.



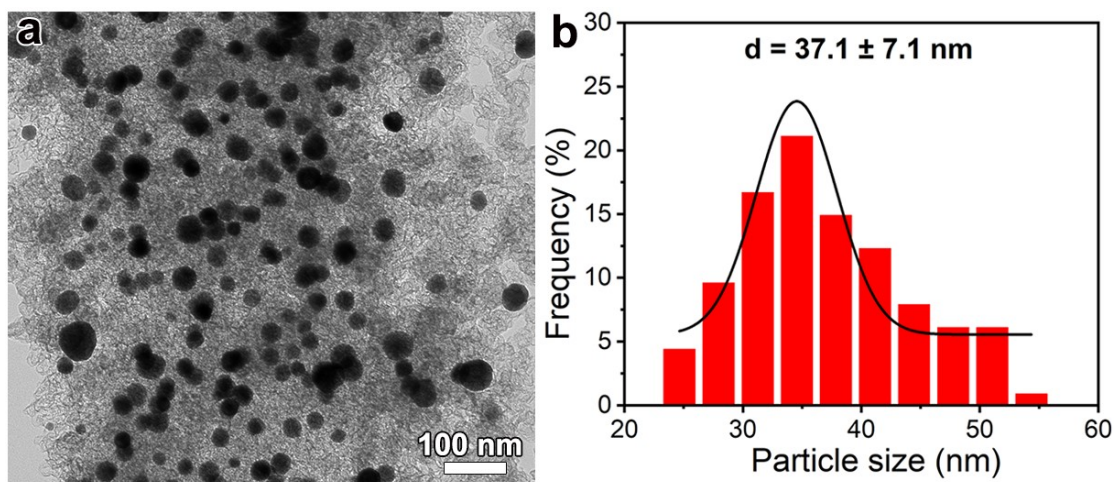

**Fig. S12.** (a) TEM image of  $\text{Ag}_3\text{Sn}/\text{C}$  and (b) the particle size distribution of  $\text{Ag}_3\text{Sn}$  IMCs.

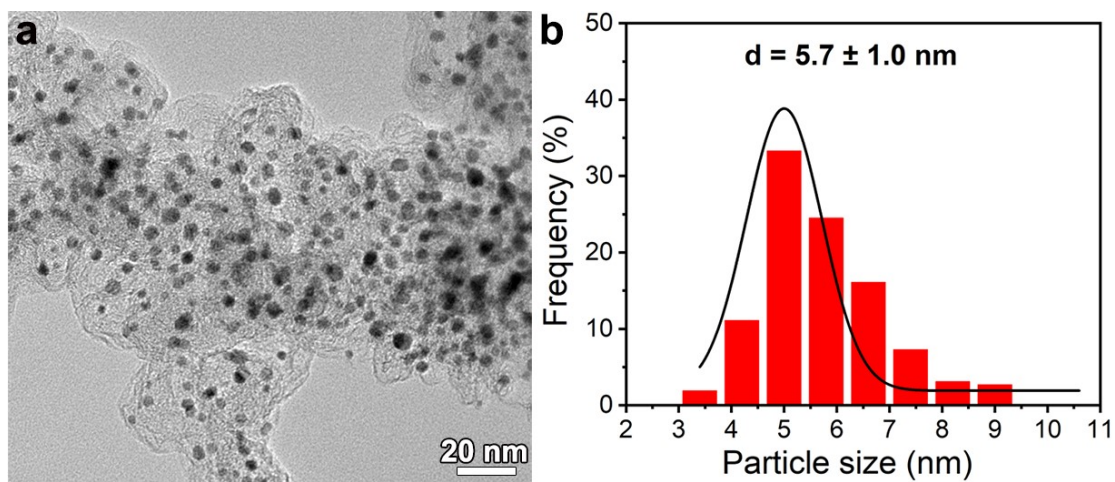

**Fig. S13.** (a) TEM image of RuIn<sub>3</sub>/C and (b) the particle size distribution of RuIn<sub>3</sub> IMCs.

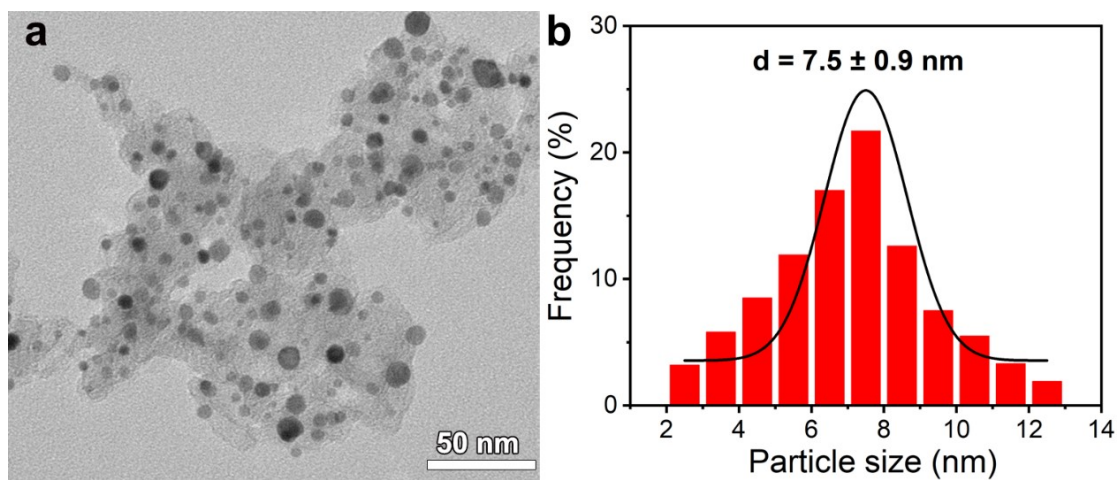

**Fig. S14.** (a) TEM image of IrIn<sub>2</sub>/C and (b) the particle size distribution of IrIn<sub>2</sub> IMCs.

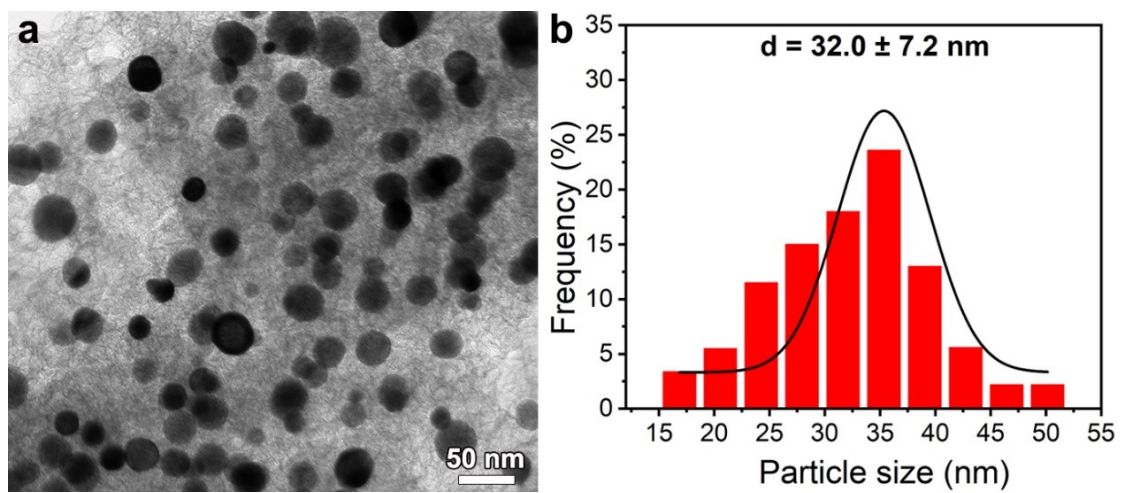

**Fig. S15.** (a) TEM image of Pd<sub>2</sub>In/C and (b) the particle size distribution of Pd<sub>2</sub>In IMCs.

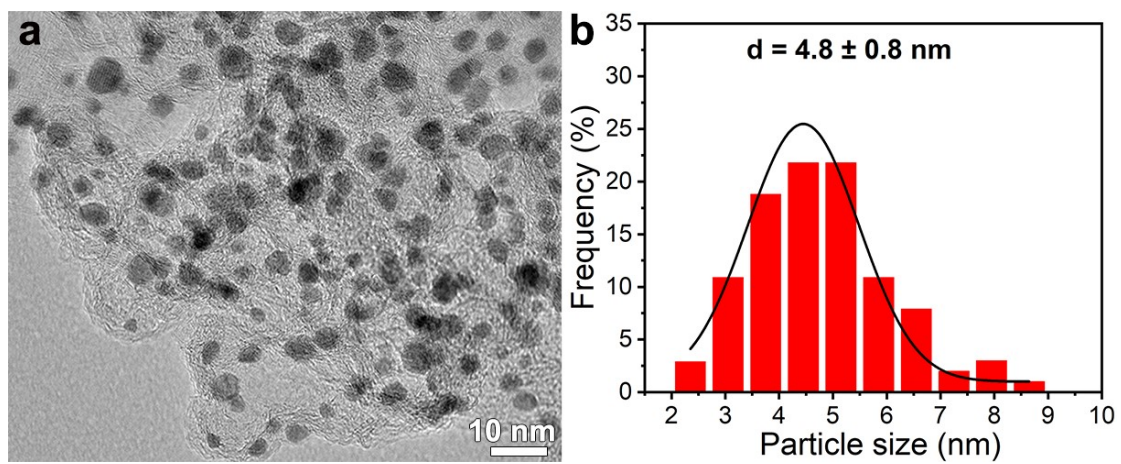

**Fig. S16.** (a) TEM image of Pt<sub>3</sub>In/C and (b) the particle size distribution of Pt<sub>3</sub>In IMCs.

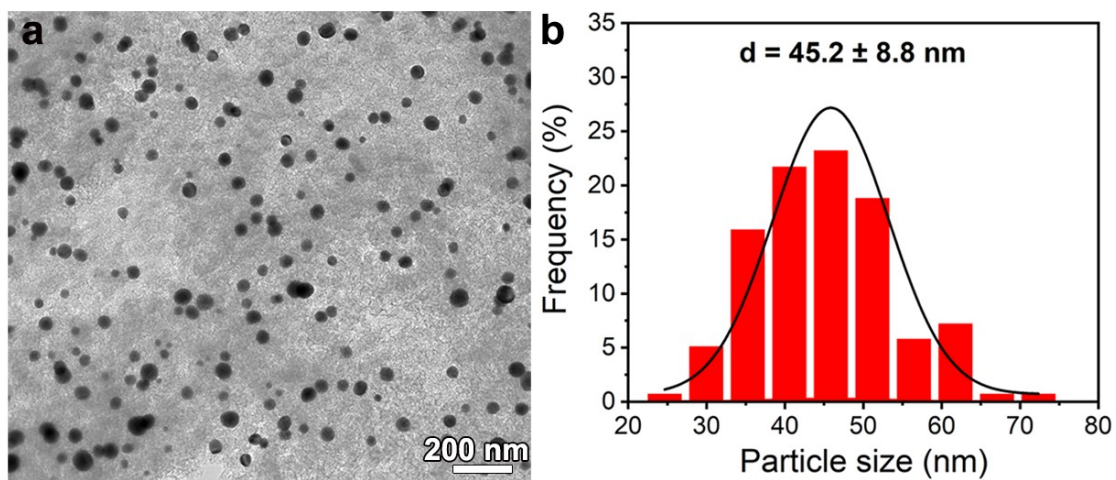

**Fig. S17.** (a) TEM image of  $\text{Au}_{10}\text{In}_3/\text{C}$  and (b) the particle size distribution of  $\text{Au}_{10}\text{In}_3$  IMCs.

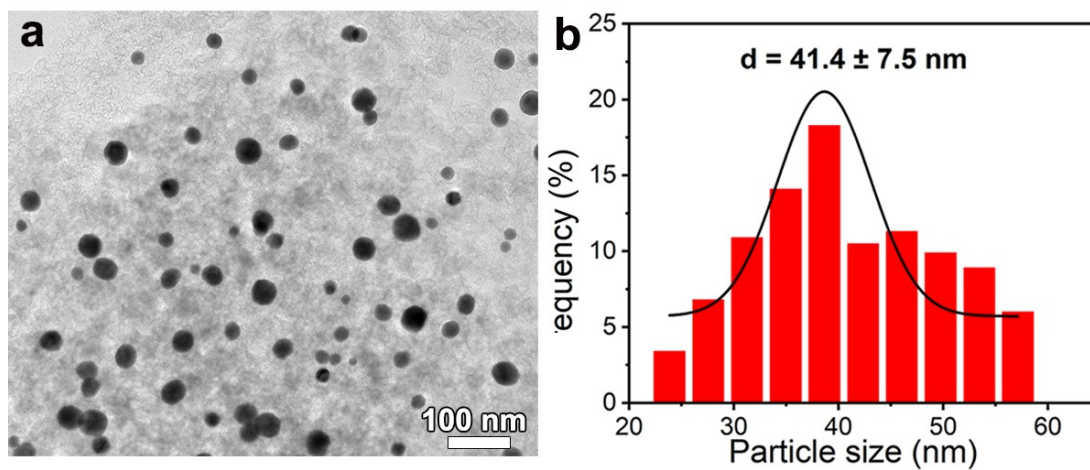

**Fig. S18.** (a) TEM image of  $\text{Au}_3\text{In}/\text{C}$  and (b) the particle size distribution of  $\text{Au}_3\text{In}$  IMCs.



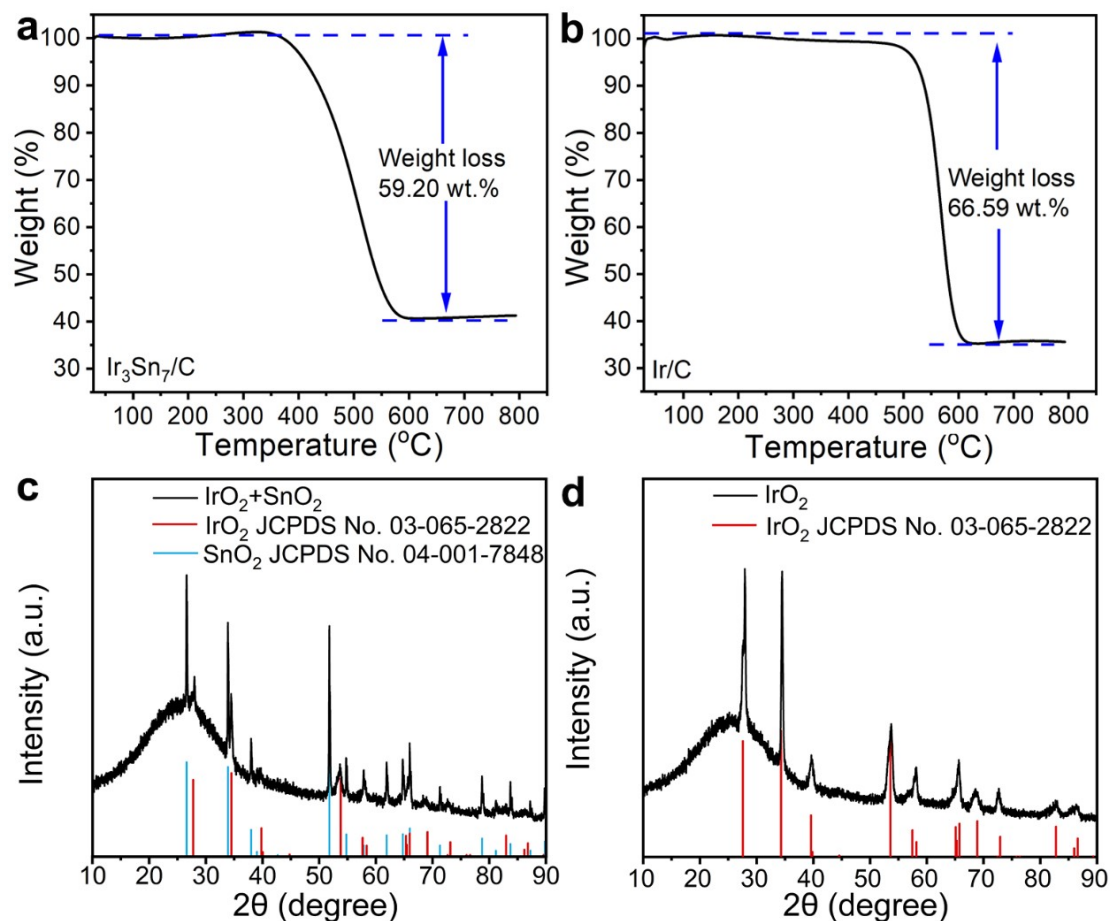

**Fig. S19.** TGA curves of (a) Ir<sub>3</sub>Sn<sub>7</sub>/C and (b) Ir/C, respectively. XRD patterns of (c) Ir<sub>3</sub>Sn<sub>7</sub>/C and (d) Ir/C after TGA measurements. The Ir contents in Ir<sub>3</sub>Sn<sub>7</sub>/C and Ir/C can be determined by combining TGA and XRD analyses.



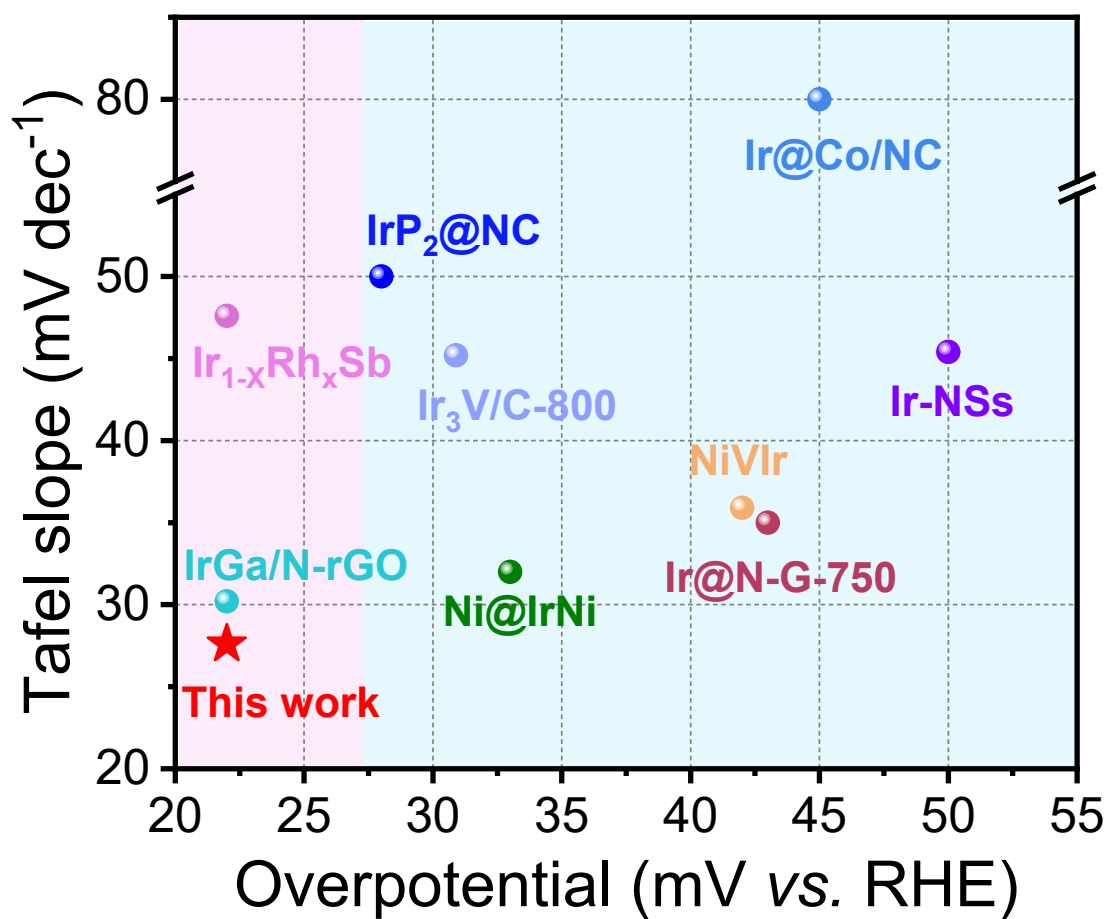

**Fig. S20.** HER performance comparison using Tafel slope vs. overpotential (at 10 mA cm<sup>-2</sup>) for different Ir-based catalysts.

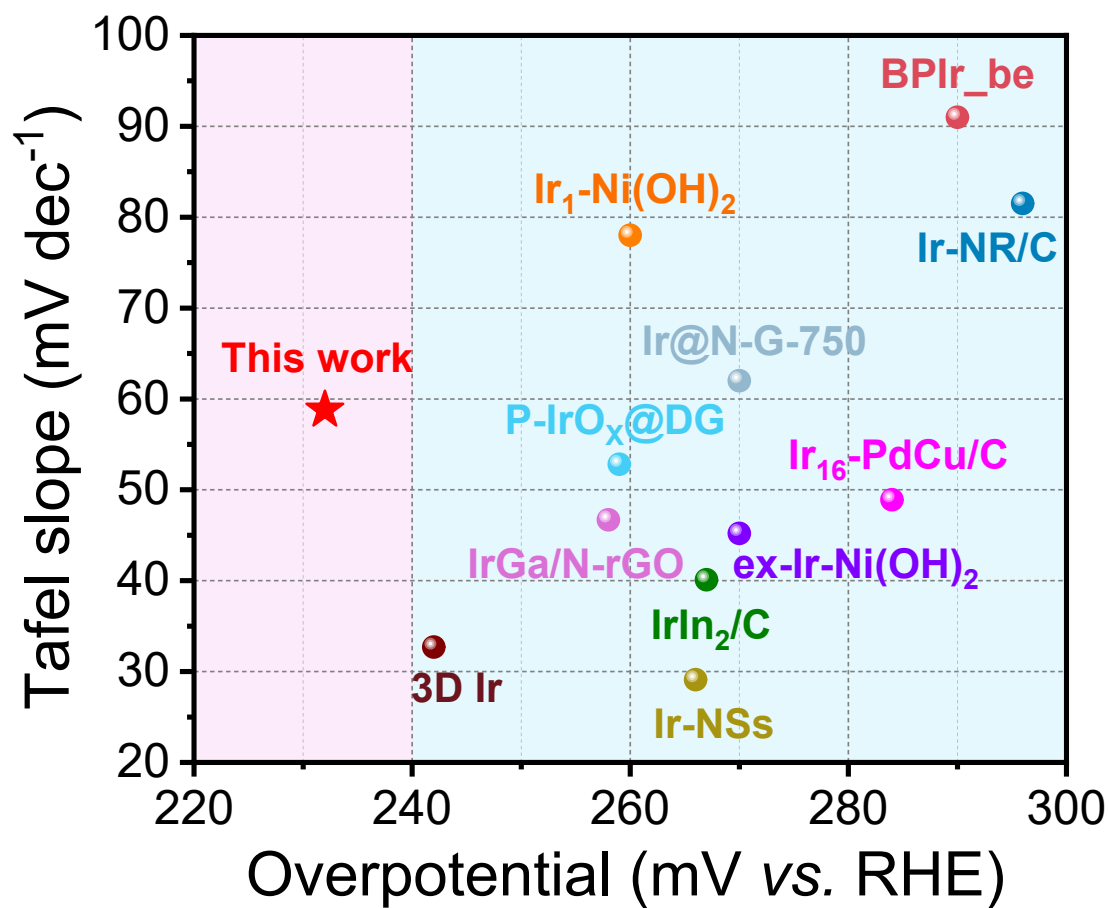

**Fig. S21.** OER performance comparison using Tafel slope vs. overpotential (at  $10 \text{ mA cm}^{-2}$ ) for different Ir-based catalysts.

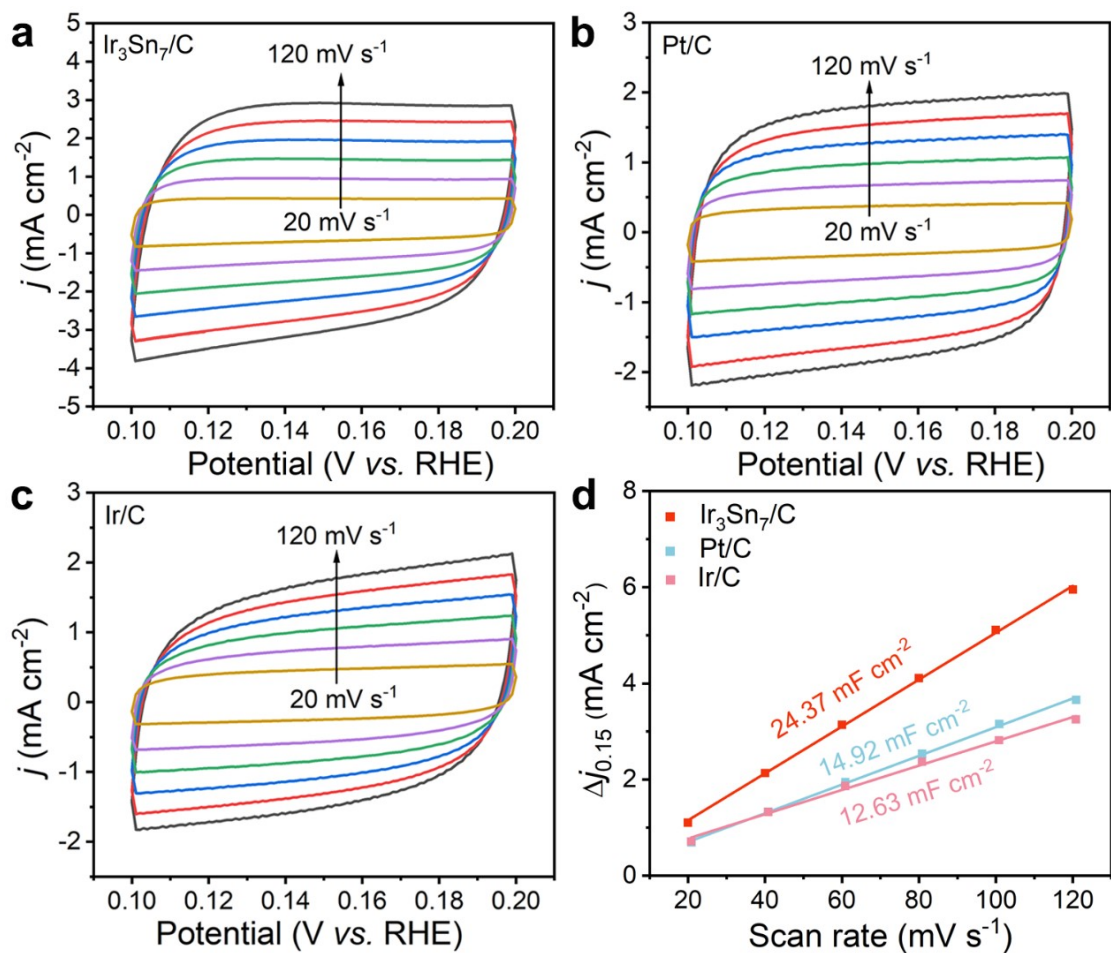

**Fig. S22.** CV curves of (a) Ir<sub>3</sub>Sn<sub>7</sub>/C, (b) commercial Pt/C and (c) Ir/C for HER at 0.10 to 0.20 V vs. RHE with scan rates from 20 to 120 mV s<sup>-1</sup>. (d)  $C_{dl}$  of Ir<sub>3</sub>Sn<sub>7</sub>/C, Ir/C and commercial Pt/C, respectively.

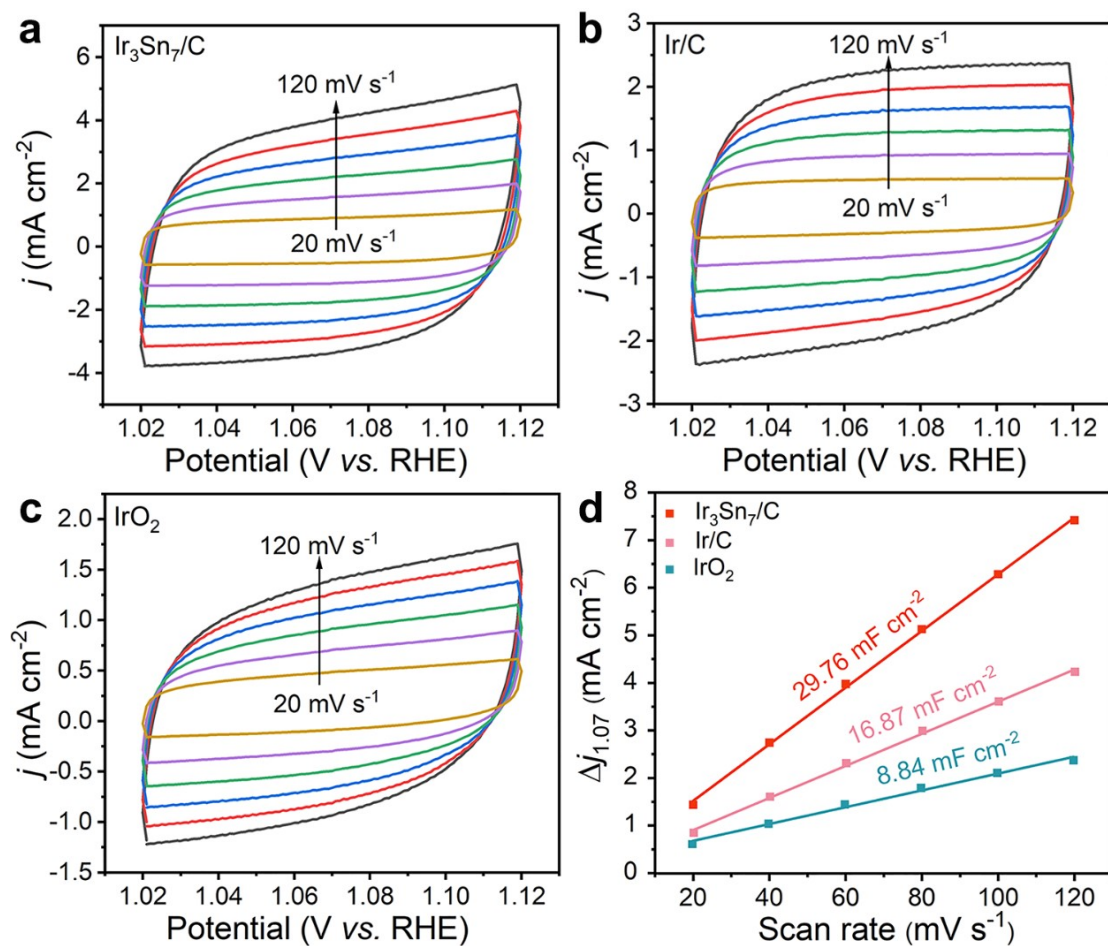

**Fig. S23.** CV curves of (a) Ir<sub>3</sub>Sn<sub>7</sub>/C, (b) Ir/C and (c) commercial IrO<sub>2</sub> for OER at 1.02 to 1.12 V vs. RHE with scan rates from 20 to 120 mV s<sup>-1</sup>. (d)  $C_{dl}$  of Ir<sub>3</sub>Sn<sub>7</sub>/C, Ir/C and commercial IrO<sub>2</sub>, respectively.

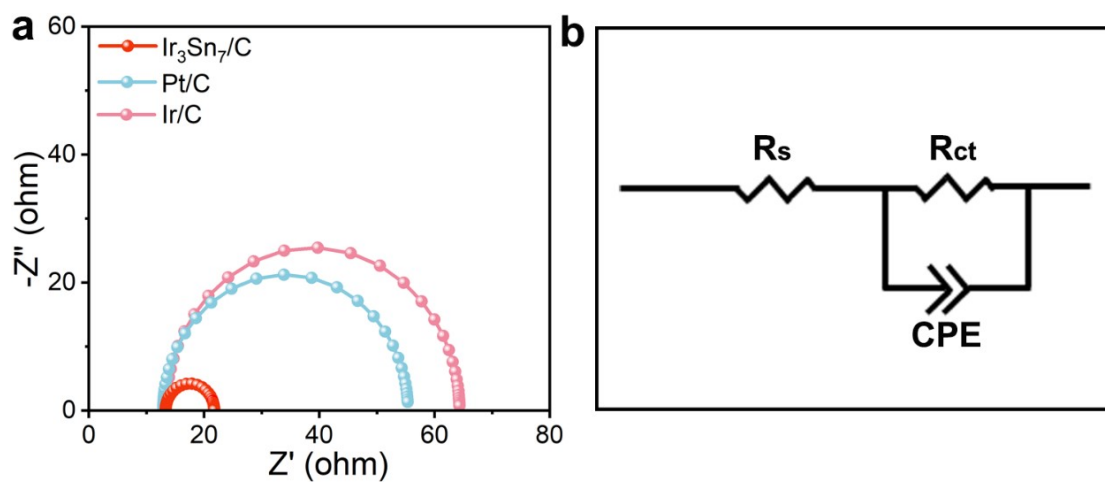

**Fig. S24.** (a) Nyquist plots of  $\text{Ir}_3\text{Sn}_7/\text{C}$ , commercial Pt/C and Ir/C collected in the frequency range of 0.1 Hz-100 kHz at -0.03 V in 1.0 M KOH for HER. (b) The corresponding equivalent electrical circuit.  $R_s$ : solution resistance, CPE: constant phase element,  $R_{ct}$ : charge transfer resistance.

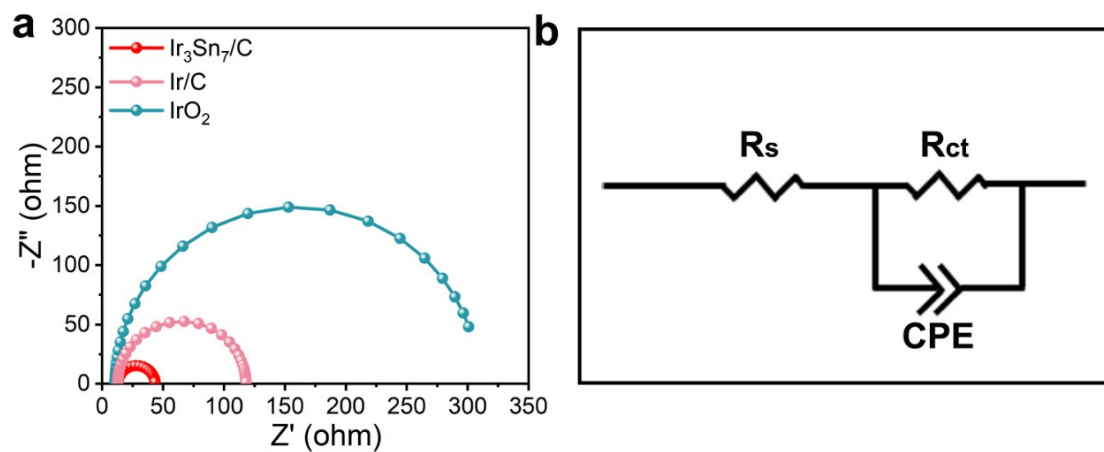

**Fig. S25.** (a) Nyquist plots of  $\text{Ir}_3\text{Sn}_7/\text{C}$ ,  $\text{Ir}/\text{C}$  and  $\text{IrO}_2$  collected in the frequency range of 0.1 Hz-100 kHz at 1.50 V in 1.0 M KOH for OER. (b) The corresponding equivalent electrical circuit.  $R_s$ : solution resistance, CPE: constant phase element,  $R_{ct}$ : charge transfer resistance.

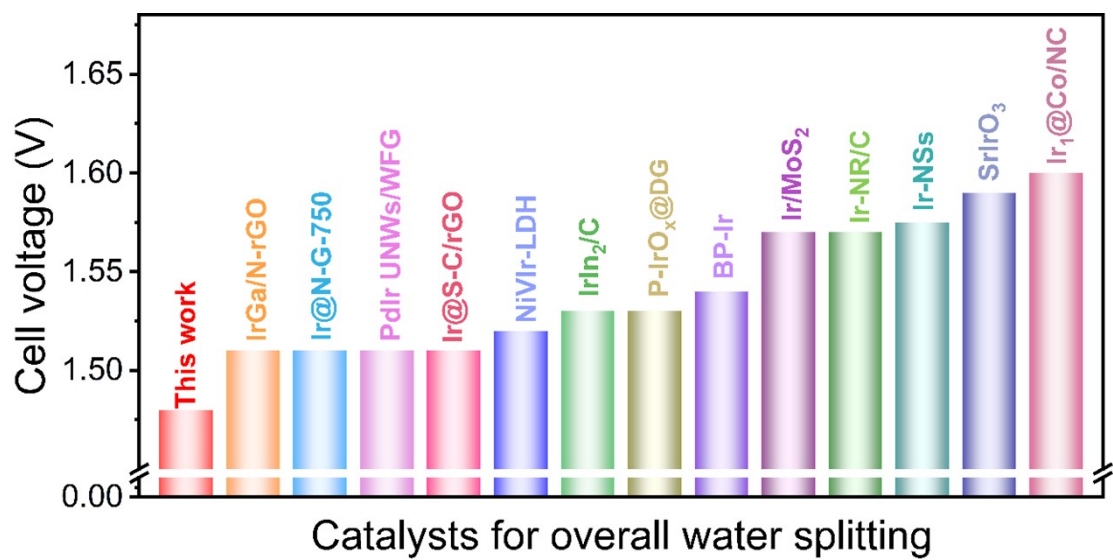

**Fig. S26.** Comparison of cell voltage of Ir<sub>3</sub>Sn<sub>7</sub>/C at 10 mA cm<sup>-2</sup> with recently reported Ir-based catalysts for electrocatalytic overall water splitting.

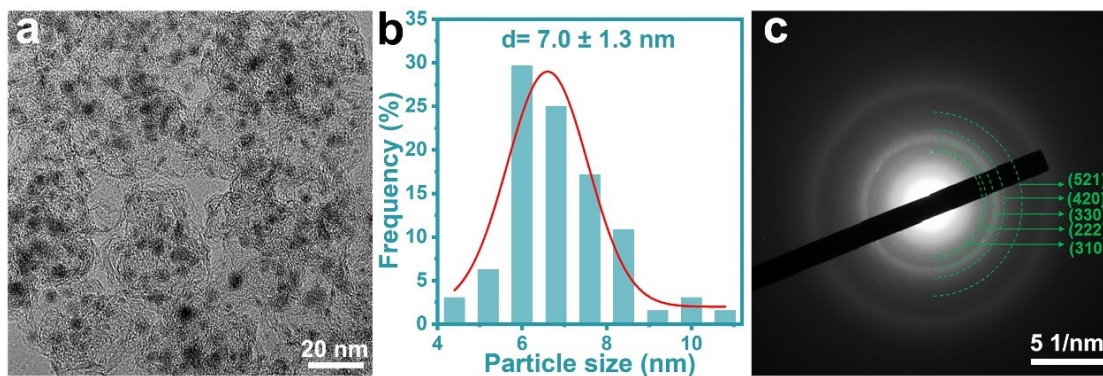

**Fig. S27.** (a) TEM image, (b) corresponding particle size distribution and (c) SAED pattern of Ir<sub>3</sub>Sn<sub>7</sub>/C as cathode after the stability test in 1.0 M KOH.



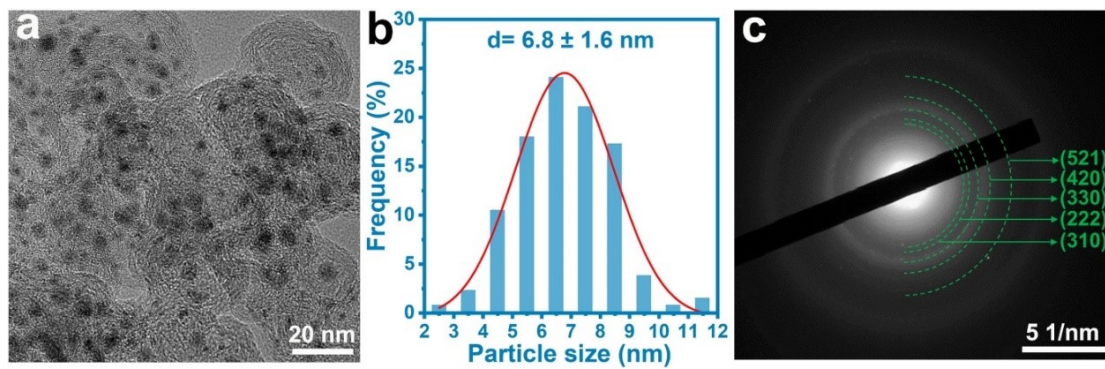

**Fig. S28.** (a) TEM image, (b) corresponding particle size distribution and (c) SAED pattern of  $\text{Ir}_3\text{Sn}_7/\text{C}$  as anode after the stability test in 1.0 M KOH.

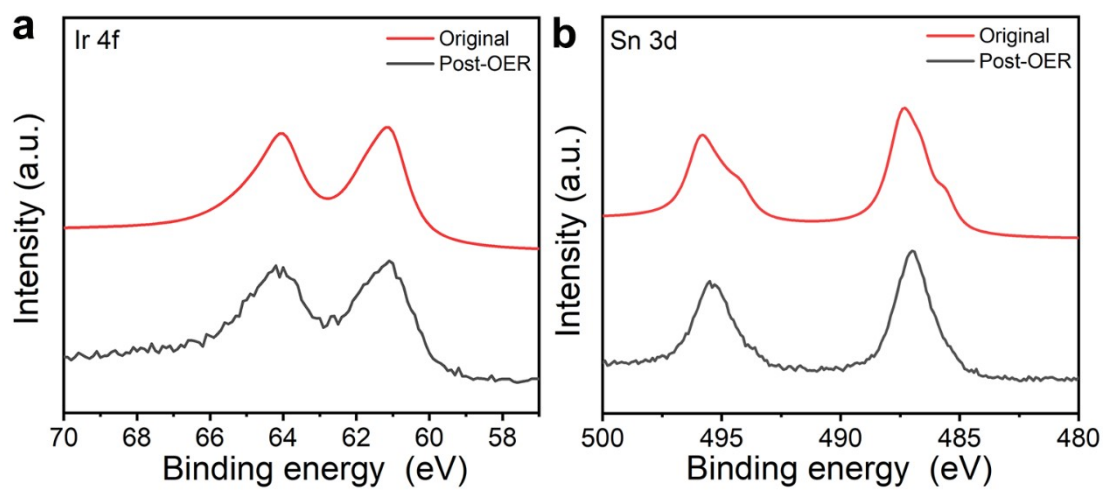

**Fig. S29.** (a) Ir 4f spectra and (b) Sn 3d spectra of Ir<sub>3</sub>Sn<sub>7</sub>/C as anode after the stability test in 1.0 M KOH.

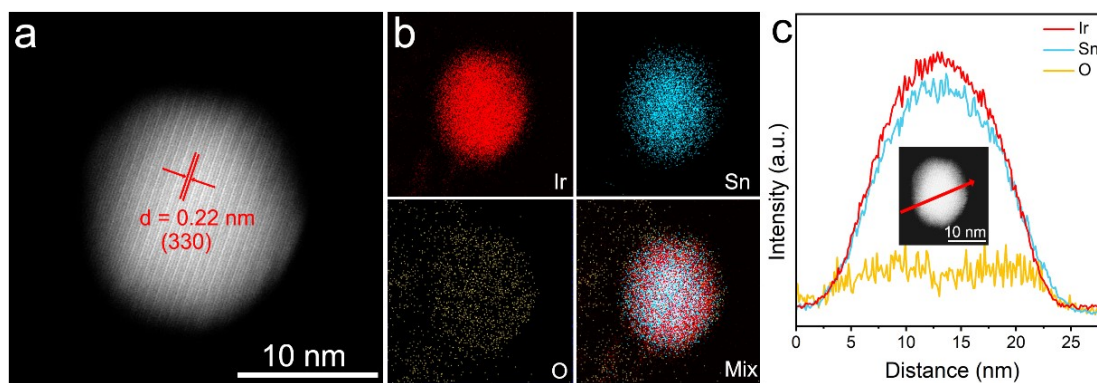

**Fig. S30.** Structure and morphological characterization of  $\text{Ir}_3\text{Sn}_7/\text{C}$  after the OER stability test in 1.0 M KOH. (a) HAADF-STEM image of an individual  $\text{Ir}_3\text{Sn}_7$  IMC nanoparticle. (b) The corresponding EDS elemental mapping images. (c) The EDS line scan profile of  $\text{Ir}_3\text{Sn}_7$  IMC.

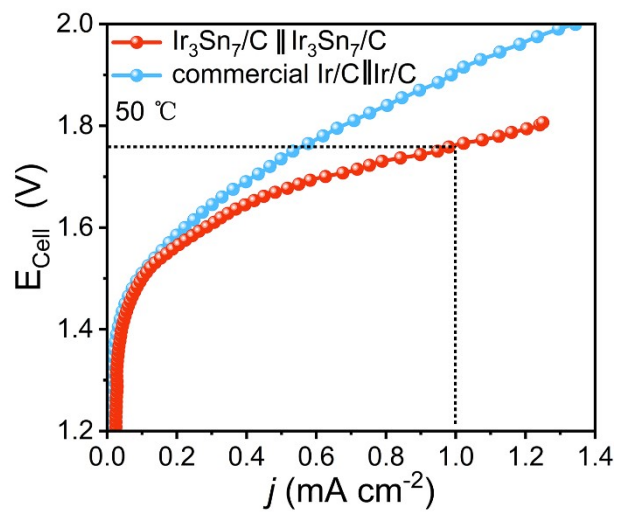

**Fig. S31.** I-V curves of the AEM water electrolyzer with different catalysts at 50 °C.

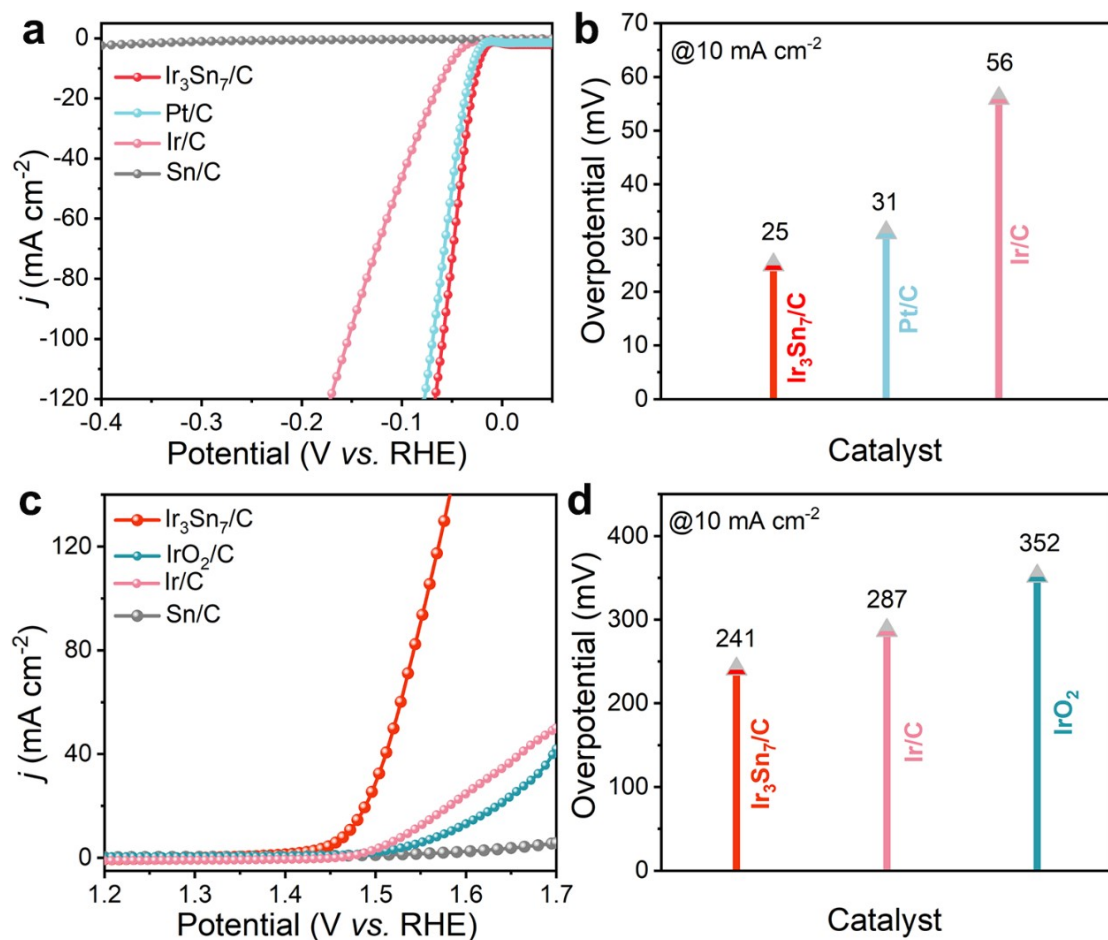

**Fig. S32.** (a) HER polarization curves with  $iR$  compensation of Ir<sub>3</sub>Sn<sub>7</sub>/C, Ir/C, Sn/C and commercial Pt/C in 0.5 M H<sub>2</sub>SO<sub>4</sub>, respectively. (b) Comparison of overpotentials at the current density of 10 mA cm<sup>-2</sup>. (c) OER polarization curves with  $iR$  compensation of Ir<sub>3</sub>Sn<sub>7</sub>/C, Ir/C, Sn/C and IrO<sub>2</sub> in 0.5 M H<sub>2</sub>SO<sub>4</sub>, respectively. (d) Comparison of overpotentials at the current density of 10 mA cm<sup>-2</sup>.

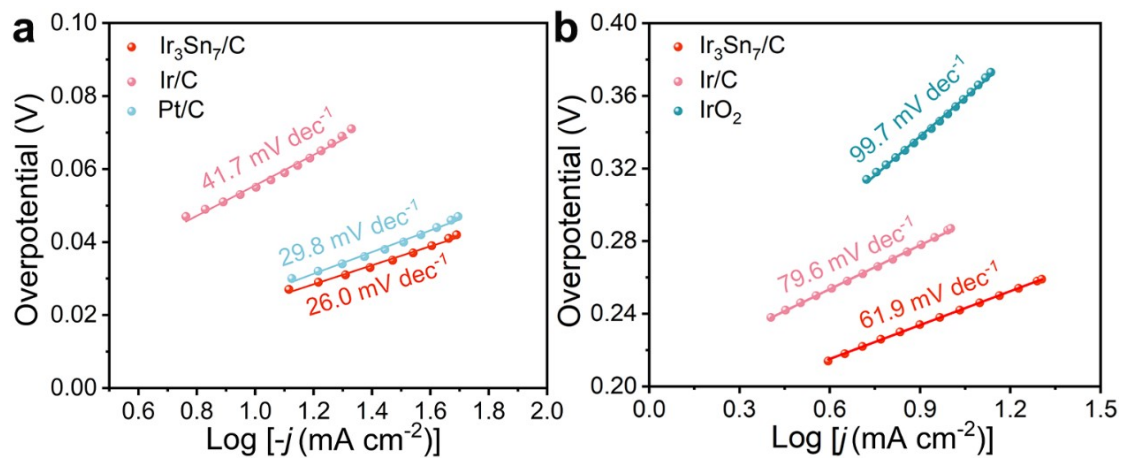

**Fig. S33.** (a) Tafel slopes values of the Ir<sub>3</sub>Sn<sub>7</sub>/C, Ir/C and commercial Pt/C in 0.5 M H<sub>2</sub>SO<sub>4</sub> for HER. (b) Tafel slopes values of the Ir<sub>3</sub>Sn<sub>7</sub>/C, Ir/C and commercial IrO<sub>2</sub> in 0.5 M H<sub>2</sub>SO<sub>4</sub> for OER.

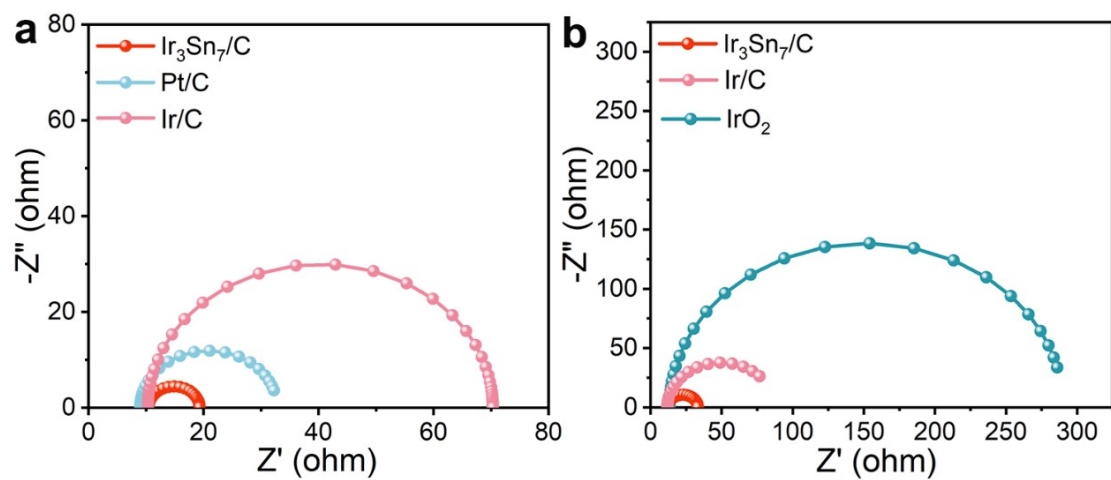

**Fig. S34.** (a) Nyquist plots for Ir<sub>3</sub>Sn<sub>7</sub>/C, Ir/C and Pt/C in 0.5 M H<sub>2</sub>SO<sub>4</sub> for HER. (b) Nyquist plots for Ir<sub>3</sub>Sn<sub>7</sub>/C, Ir/C and IrO<sub>2</sub> in 0.5 M H<sub>2</sub>SO<sub>4</sub> for OER.

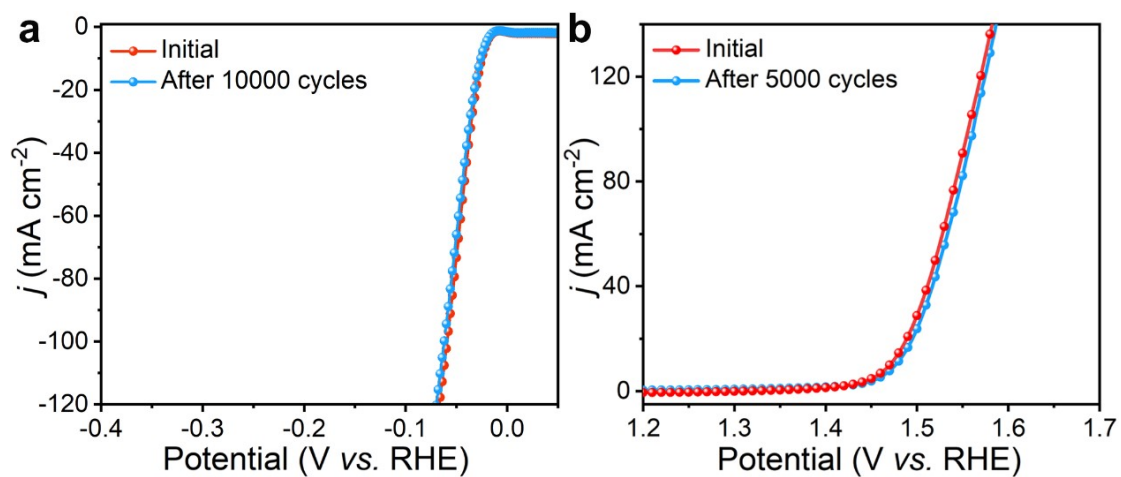

**Fig. S35.** (a) LSV polarization curves of Ir<sub>3</sub>Sn<sub>7</sub>/C before and after 10,000 cycles for HER in 0.5 M H<sub>2</sub>SO<sub>4</sub>. (b) LSV polarization curves of Ir<sub>3</sub>Sn<sub>7</sub>/C before and after 5,000 cycles for OER in 0.5 M H<sub>2</sub>SO<sub>4</sub>.



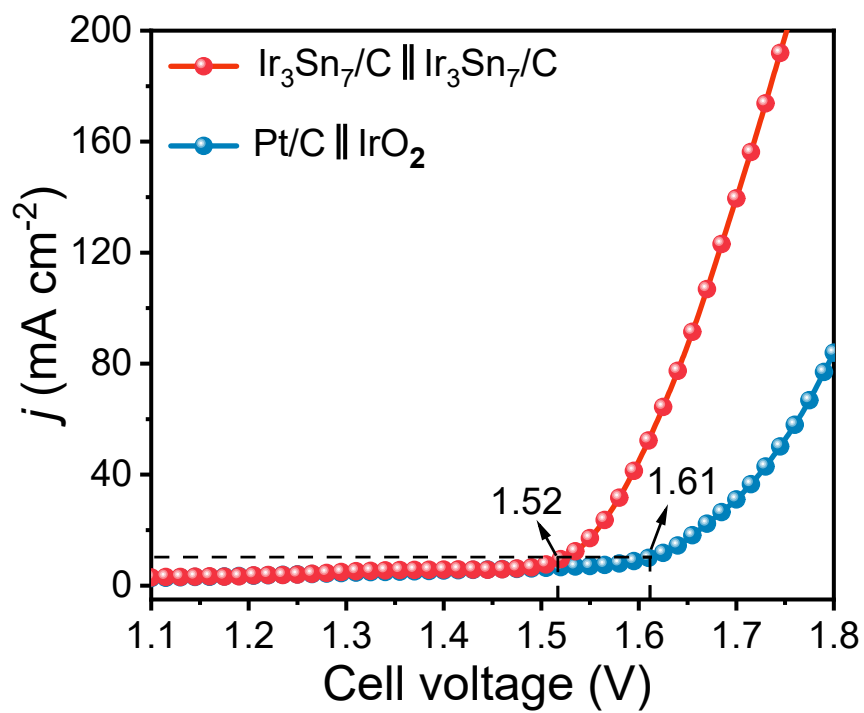

**Fig. S36.** The *iR*-corrected LSV polarization curves of Ir<sub>3</sub>Sn<sub>7</sub>/C||Ir<sub>3</sub>Sn<sub>7</sub>/C and commercial Pt/C||IrO<sub>2</sub> for overall water splitting in 0.5 M H<sub>2</sub>SO<sub>4</sub>.

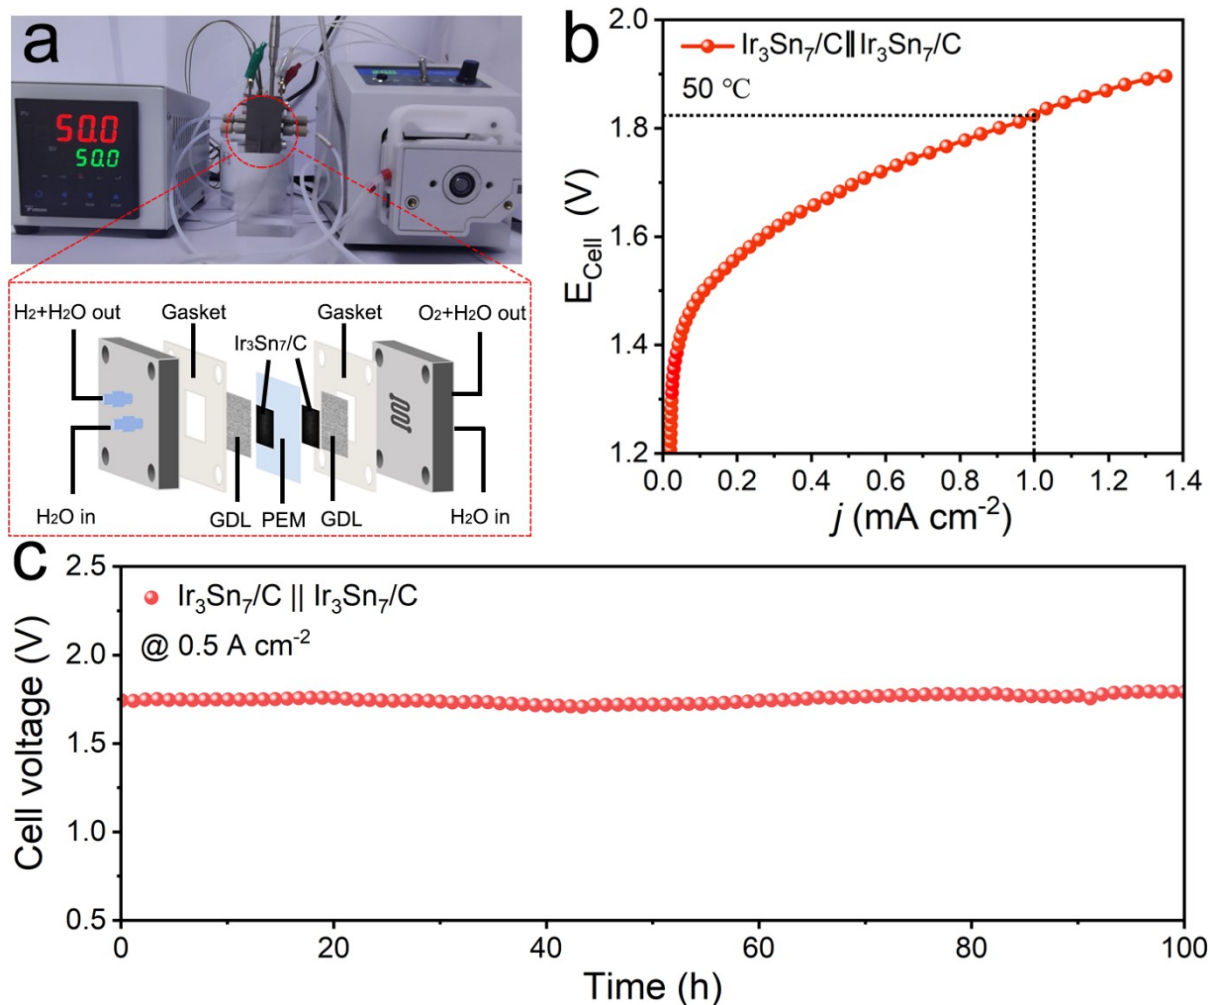

**Fig. S37.** (a) Photograph of the PEM water electrolysis device (the inset shows a schematic diagram of the PEM water electrolyzer). (b) Polarization curves of the PEM water electrolyzer using the prepared Ir<sub>3</sub>Sn<sub>7</sub>/C as both anode and cathode with the PEM water electrolyzer at 50 °C. (c) Chronopotentiometry tests of Ir<sub>3</sub>Sn<sub>7</sub>/C || Ir<sub>3</sub>Sn<sub>7</sub>/C at 0.5 A cm<sup>-2</sup> in 0.5 M H<sub>2</sub>SO<sub>4</sub>.

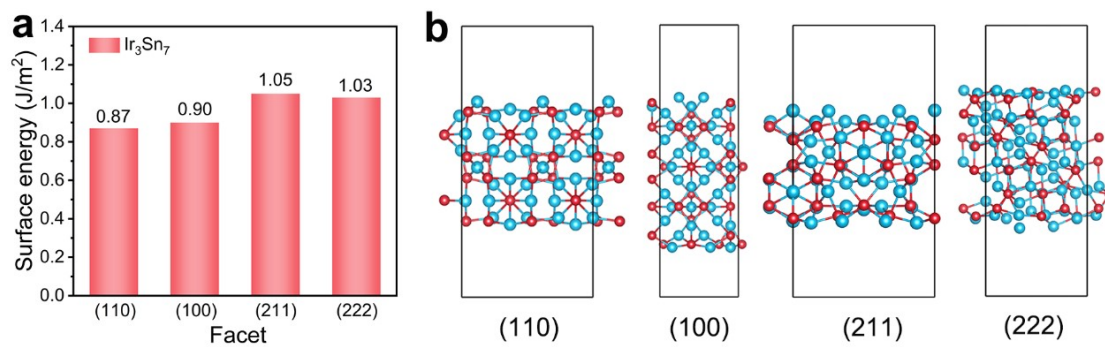

**Fig. S38.** (a) Surface energies of Ir<sub>3</sub>Sn<sub>7</sub> (110), (100), (211) and (222) facets and (b) the corresponding crystal models.

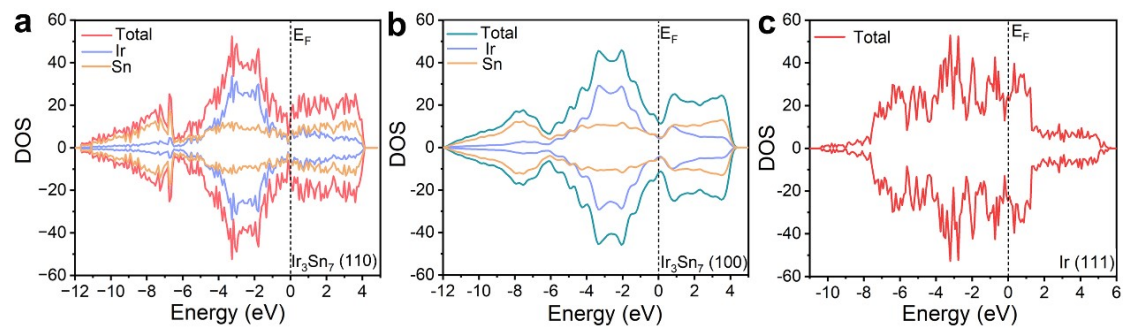

**Fig. S39.** Calculated DOSs of (a)  $\text{Ir}_3\text{Sn}_7$  (110), (b)  $\text{Ir}_3\text{Sn}_7$  (100) and (c) Ir (111).

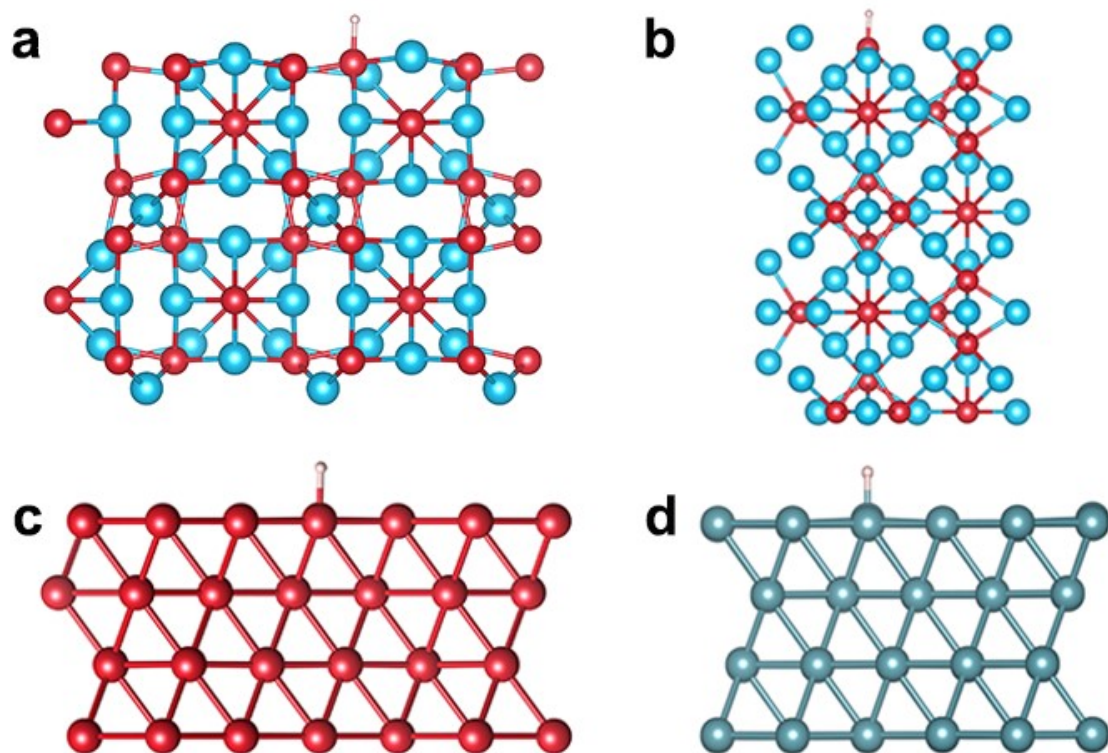

**Fig. S40.** Optimized structural models of  $\ast\text{H}$  on the surface of (a)  $\text{Ir}_3\text{Sn}_7$  (110), (b)  $\text{Ir}_3\text{Sn}_7$  (100), (c) Ir (111) and (d) Pt (111).

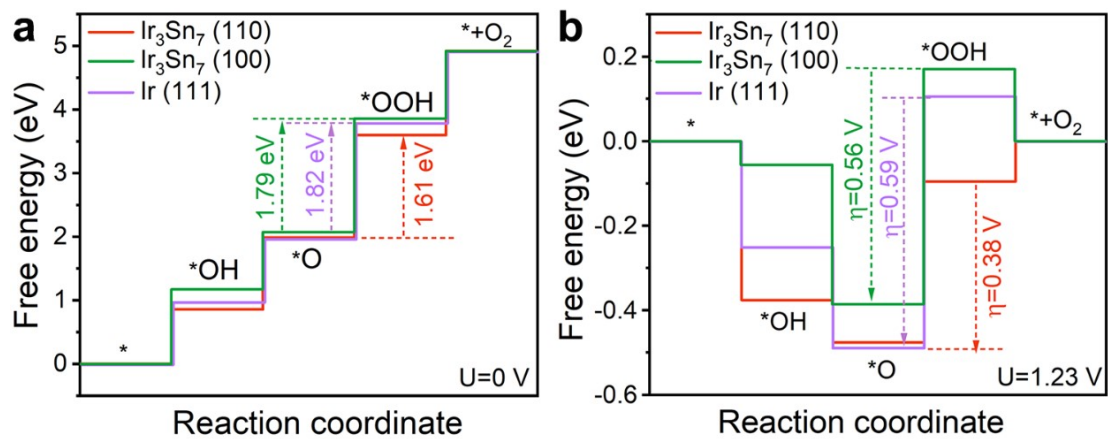

**Fig. S41.** The free energy diagrams of OER process on Ir<sub>3</sub>Sn<sub>7</sub> (110), Ir<sub>3</sub>Sn<sub>7</sub> (100) and Ir (111) under the applied overpotential of (a) 0 and (b) 1.23 V respectively.

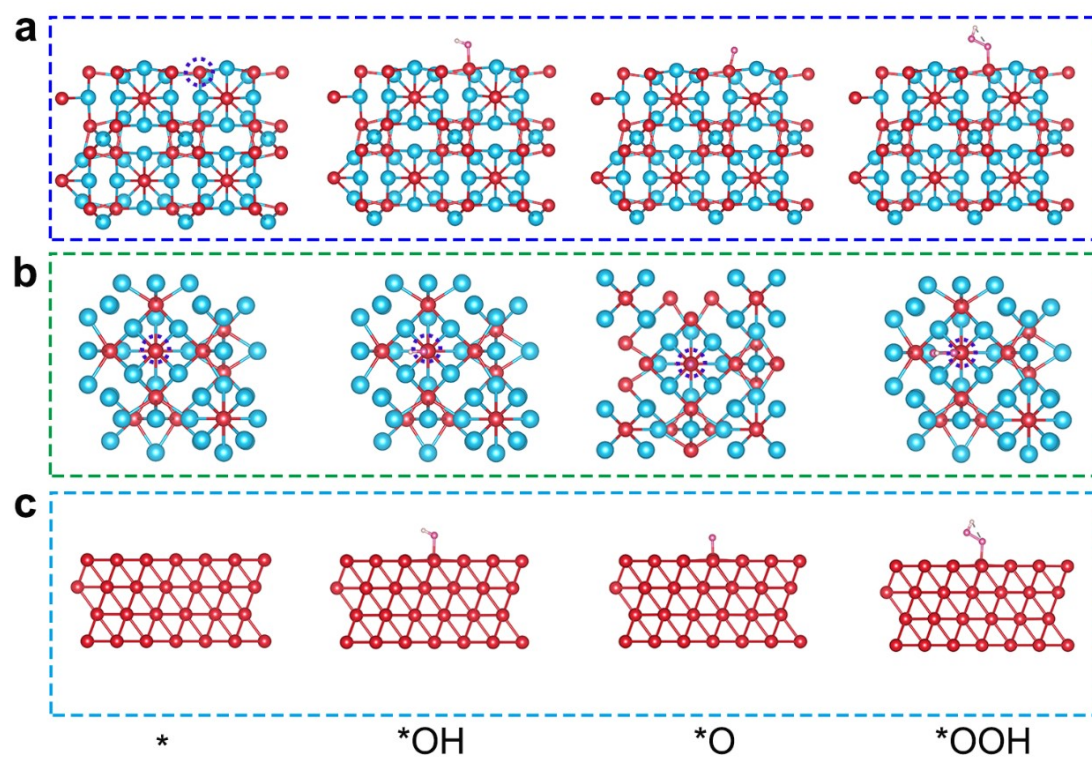

**Fig. S42.** Structural models of intermediates on (a)  $\text{Ir}_3\text{Sn}_7(110)$ , (b)  $\text{Ir}_3\text{Sn}_7(100)$  and (c)  $\text{Ir}(111)$  in the OER process.



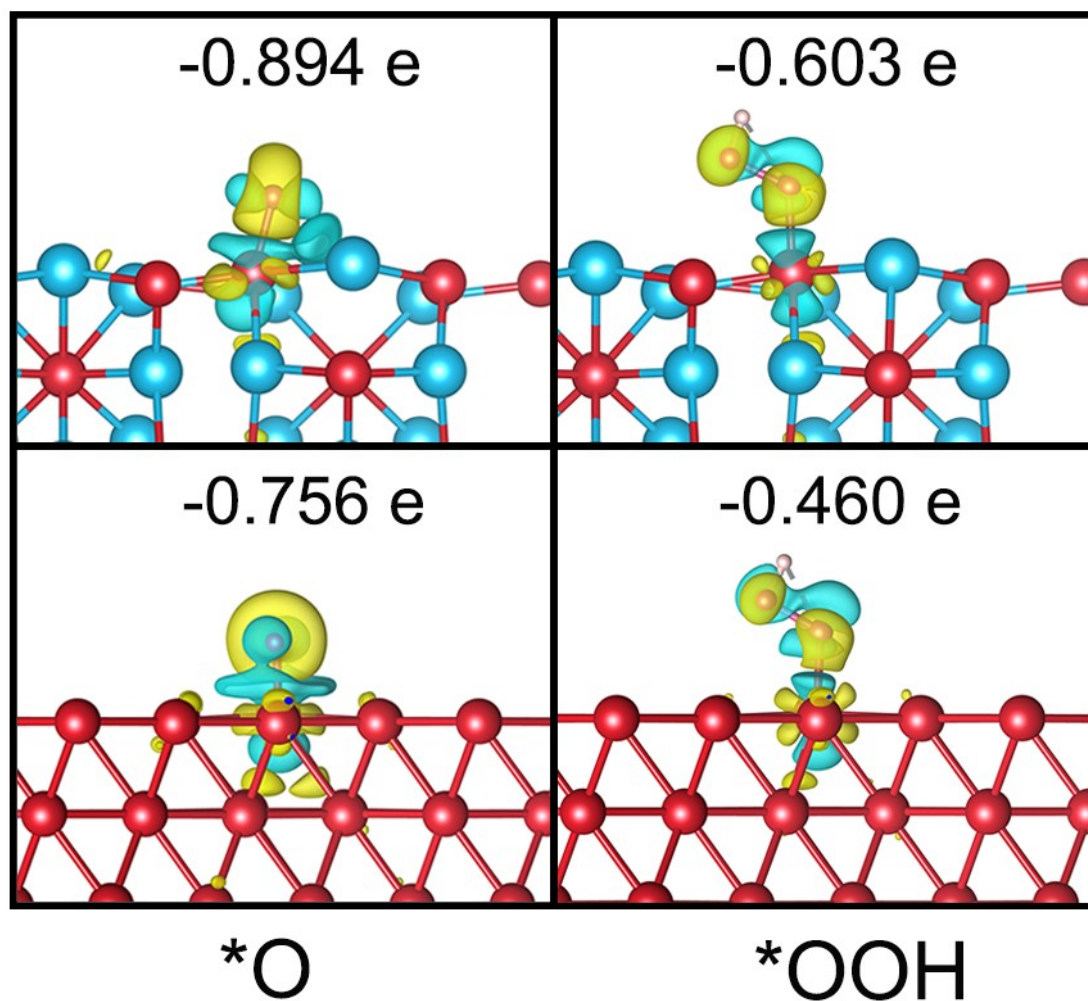

**Fig. S43.** 3D charge density difference maps and Bader charge analyses of \*O and \*OOH intermediates on Ir<sub>3</sub>Sn<sub>7</sub> (110) and Ir (111). The isosurface value is set to 0.004 e Å<sup>-3</sup>. Yellow and cyan regions represent the electron accumulation and deletion, respectively.



## Supplementary Tables

**Table S1.** The lattice parameters of the Ir<sub>3</sub>Sn<sub>7</sub> IMCs determined by the Rietveld refinement analysis. And the theoretical values from Inorganic Crystal Structure Database (ICSD) are also provided.

| Simulated values |              | Theoretical values |
|------------------|--------------|--------------------|
| Space group      | $Im\bar{3}m$ | $Im\bar{3}m$       |
| a (Å)            | 9.353        | 9.352              |
| b (Å)            | 9.353        | 9.352              |
| c (Å)            | 9.353        | 9.352              |
| $\alpha$ (°)     | 90°          | 90°                |
| $\beta$ (°)      | 90°          | 90°                |
| $\gamma$ (°)     | 90°          | 90°                |

**Table S2.** EXAFS fitting parameters at the Ir L<sub>3</sub>-edge for three samples ( $S_0^2=0.75$ ).

| Sample                          | Path  | CN      | R (Å)     | $\sigma^2$ (Å <sup>2</sup> ) | $\Delta E_0$ (eV) | R factor (%) |
|---------------------------------|-------|---------|-----------|------------------------------|-------------------|--------------|
| Ir foil                         | Ir-Ir | 12*     | 2.71±0.01 | 0.0032                       | 9.2               | 0.0076       |
| IrO <sub>2</sub>                | Ir-O  | 6.0±0.2 | 1.98±0.01 | 0.0020                       | 11.6              | 0.0060       |
| Ir <sub>3</sub> Sn <sub>7</sub> | Ir-Sn | 8.0     | 2.54±0.01 | 0.0121                       | -14.2             | 0.0118       |

<sup>a</sup>CN, coordination number; <sup>b</sup>R, distance between absorber and backscatter atoms; <sup>c</sup> $\sigma^2$ , Debye-Waller factor to account for both thermal and structural disorders; <sup>d</sup> $\Delta E_0$ , inner potential correction; R factor indicates the goodness of the fit.  $S_0^2$  was fixed to 0.75, according to the experimental EXAFS fit of Ir foil by fixing CN as the known crystallographic value.

**Table S3.** Type and dosage of noble metals precursors and p-block element precursors used for the synthesis of noble metal-p-block-element IMCs supported on commercial carbon.

| Samples                             | noble metals precursors                             |               | p-block element precursors                           |               |
|-------------------------------------|-----------------------------------------------------|---------------|------------------------------------------------------|---------------|
|                                     | Type                                                | Dosage (mmol) | Type                                                 | Dosage (mmol) |
| Ru <sub>3</sub> Sn <sub>7</sub> /C  | RuCl <sub>3</sub> ·xH <sub>2</sub> O                | 0.03          |                                                      | 0.07          |
| AuSn/C                              | HAuCl <sub>4</sub> ·3H <sub>2</sub> O               | 0.05          | SnCl <sub>2</sub> ·2H <sub>2</sub> O                 | 0.05          |
| Ag <sub>3</sub> Sn/C                | AgNO <sub>3</sub>                                   | 0.075         |                                                      | 0.025         |
| RuIn <sub>3</sub> /C                | RuCl <sub>3</sub> ·xH <sub>2</sub> O                | 0.025         |                                                      | 0.075         |
| IrIn <sub>2</sub> /C                | IrCl <sub>3</sub> ·xH <sub>2</sub> O                | 0.03          |                                                      | 0.06          |
| Pd <sub>2</sub> In/C                | K <sub>2</sub> PdCl <sub>4</sub>                    | 0.06          |                                                      | 0.03          |
| Pt <sub>3</sub> In/C                | H <sub>2</sub> PtCl <sub>6</sub> ·6H <sub>2</sub> O | 0.06          | In(NO <sub>3</sub> ) <sub>3</sub> ·xH <sub>2</sub> O | 0.02          |
| Au <sub>10</sub> In <sub>3</sub> /C | HAuCl <sub>4</sub> ·3H <sub>2</sub> O               | 0.1           |                                                      | 0.03          |
| Au <sub>3</sub> In/C                | HAuCl <sub>4</sub> ·3H <sub>2</sub> O               | 0.06          |                                                      | 0.02          |

**Table S4.** The lattice parameters of the samples determined by the Rietveld refinement analysis. And the theoretical values from Inorganic Crystal Structure Database (ICSD) are also provided.

| Samples                             | Space group  | a (Å)  | b (Å)  | c (Å)  | $\alpha$ | $\beta$ | $\gamma$ |
|-------------------------------------|--------------|--------|--------|--------|----------|---------|----------|
| Ru <sub>3</sub> Sn <sub>7</sub> /C  | $Im\bar{3}m$ | 9.363  | 9.363  | 9.363  | 90°      | 90°     | 90°      |
| AuSn/C                              | $P6_3/mmc$   | 4.320  | 4.320  | 5.521  | 90°      | 90°     | 120°     |
| Ag <sub>3</sub> Sn/C                | $pmmn$       | 5.946  | 4.784  | 5.180  | 90°      | 90°     | 90°      |
| RuIn <sub>3</sub> /C                | $P4_2/mnm$   | 7.006  | 7.006  | 7.263  | 90°      | 90°     | 90°      |
| IrIn <sub>2</sub> /C                | $Fddd$       | 9.804  | 5.352  | 18.089 | 90°      | 90°     | 90°      |
| Pd <sub>2</sub> In/C                | $pnma$       | 5.619  | 4.216  | 8.233  | 90°      | 90°     | 90°      |
| Pt <sub>3</sub> In/C                | $Pm\bar{3}m$ | 4.028  | 4.028  | 4.028  | 90°      | 90°     | 90°      |
| Au <sub>10</sub> In <sub>3</sub> /C | $P6_3/m$     | 10.520 | 10.520 | 4.789  | 90°      | 90°     | 120°     |
| Au <sub>3</sub> In/C                | $pmmn$       | 5.851  | 4.737  | 5.145  | 90°      | 90°     | 90°      |

**Table S5.** Comparisons of the electrocatalytic HER performance of Ir<sub>3</sub>Sn<sub>7</sub>/C with the Ir-based electrocatalysts reported previously.

| Catalysts                            | Electrolyte | Overpotential at 10 mA cm <sup>-2</sup> for HER (mV) | Tafel slope (mV dec <sup>-1</sup> ) | References                                                |
|--------------------------------------|-------------|------------------------------------------------------|-------------------------------------|-----------------------------------------------------------|
| Ir <sub>3</sub> Sn <sub>7</sub> /C   | 1.0 M KOH   | 22                                                   | 27.6                                | This work                                                 |
| Ir-Ni(OH) <sub>2</sub> /NF           | 1.0 M KOH   | 23                                                   | N/A                                 | <i>ACS Nano</i> <b>2025</b> , 19, 38849                   |
| Ir-V <sub>2</sub> O <sub>3</sub>     | 1.0 M KOH   | 26                                                   | 37                                  | <i>Angew. Chem. Int. Ed.</i> <b>2024</b> , 26, e202406427 |
| Ir/NiPS <sub>3</sub>                 | 1.0 M KOH   | 23                                                   | N/A                                 | <i>Nat. Commun.</i> <b>2024</b> , 15, 2851                |
| Ir-rEGO                              | 1.0 M KOH   | 114                                                  | N/A                                 | <i>Adv. Funct. Mater.</i> <b>2024</b> , 34, 2313530       |
| Ir/WOx/rGO                           | 1.0 M KOH   | 53                                                   | N/A                                 | <i>Energy Environ. Mater.</i> <b>2021</b> , 4, 681        |
| IrGa/N-rGO                           | 1.0 M KOH   | 22                                                   | 30.2                                | <i>Adv. Energy Mater.</i> <b>2023</b> , 13, 2202703       |
| Ir <sub>1-x</sub> Rh <sub>x</sub> Sb | 1.0 M KOH   | 22                                                   | 47.6                                | <i>Adv. Energy Mater.</i> <b>2022</b> , 12, 2200855.      |
| CBC-Ir                               | 1.0 M KOH   | 33                                                   | 16.7                                | <i>Adv. Funct. Mater.</i> <b>2021</b> , 31, 2105562       |
| Ni@IrNi                              | 1.0 M KOH   | 33                                                   | 32                                  | <i>Energy Environ. Sci.</i> <b>2023</b> , 16, 6120        |
| Ir/C-800                             | 1.0 M KOH   | 28                                                   | 56.2                                | <i>ACS Nano</i> <b>2023</b> , 17, 24395                   |
| D-IrTe <sub>2</sub> HNSs             | 1.0 M KOH   | 54                                                   | 32.7                                | <i>Adv. Funct. Mater.</i> <b>2020</b> , 30, 2004375       |
| IrSi                                 | 1.0 M KOH   | 38                                                   | N/A                                 | <i>ACS Catal.</i> <b>2022</b> , 12, 2623                  |
| IrP <sub>2</sub> @NC                 | 1.0 M KOH   | 28                                                   | 50                                  | <i>Energy Environ. Sci.</i> <b>2019</b> , 12, 952         |
| Ir-gCN                               | 1.0 M KOH   | 60.2                                                 | 47.6                                | <i>Appl. Catal. B Environ.</i> <b>2022</b> , 310, 121318  |
| Ir-NSs                               | 1.0 M KOH   | 50                                                   | 45.4                                | <i>Natl. Sci. Rev.</i> <b>2020</b> , 7, 1340              |

N/A: Not available.

**Table S6.** Comparisons of the electrocatalytic OER performance of Ir<sub>3</sub>Sn<sub>7</sub>/C with the Ir-based electrocatalysts reported previously.

| Catalysts                             | Electrolyte | Overpotential at 10 mA cm <sup>-2</sup> for OER (mV) | Tafel slope (mV dec <sup>-1</sup> ) | References                                               |
|---------------------------------------|-------------|------------------------------------------------------|-------------------------------------|----------------------------------------------------------|
| Ir <sub>3</sub> Sn <sub>7</sub> /C    | 1.0 M KOH   | 232                                                  | 58.8                                | This work                                                |
| Ir-rEGO                               | 1.0 M KOH   | 294                                                  | N/A                                 | <i>Adv. Funct. Mater.</i> <b>2024</b> , 34, 2313530      |
| Ir/NiPS <sub>3</sub>                  | 1.0 M KOH   | 236                                                  | N/A                                 | <i>Nat. Commun.</i> <b>2024</b> , 15, 2851               |
| IrIn <sub>2</sub> /C                  | 1.0 M KOH   | 267                                                  | 40.1                                | <i>Adv. Funct. Mater.</i> <b>2024</b> , 34, 2311683      |
| IrGa/N-rGO                            | 1.0 M KOH   | 258                                                  | 46.7                                | <i>Adv. Energy Mater.</i> <b>2023</b> , 13, 2202703      |
| Ir-NSs                                | 1.0 M KOH   | 266                                                  | 29.1                                | <i>Natl. Sci. Rev.</i> <b>2020</b> , 7, 1340             |
| Ir1/CoOOH                             | 1.0 M KOH   | 320                                                  | 33                                  | <i>J. Am. Chem. Soc.</i> <b>2022</b> , 144, 9271         |
| Ir <sub>1</sub> @Co/NC                | 1.0 M KOH   | 260                                                  | N/A                                 | <i>Angew. Chem. Int. Ed.</i> <b>2019</b> , 58, 11868     |
| Ir <sub>1</sub> -Ni(OH) <sub>2</sub>  | 1.0 M KOH   | 260                                                  | 78                                  | <i>Nano Lett.</i> <b>2022</b> , 22, 3832                 |
| BPIr_be                               | 1.0 M KOH   | 290                                                  | 91                                  | <i>Adv. Mater.</i> <b>2021</b> , 33, 2104638.            |
| Li-IrSe <sub>2</sub>                  | 1.0 M KOH   | 270                                                  | N/A                                 | <i>Angew. Chem. Int. Ed.</i> <b>2019</b> , 58, 14764     |
| Ir <sub>0.71</sub> Cu <sub>0.29</sub> | 1.0 M KOH   | 355                                                  | N/A                                 | <i>Angew. Chem. Int. Ed.</i> <b>2018</b> , 57, 4505      |
| ex -Ir - Ni(OH) <sub>2</sub>          | 1.0 M KOH   | 270                                                  | 45.2                                | <i>ACS Catal.</i> <b>2021</b> , 11, 5386                 |
| RuIrO <sub>x</sub>                    | 1.0 M KOH   | 250                                                  | 50                                  | <i>Nat. Commun.</i> <b>2019</b> , 10, 4875               |
| Ir-NR/C                               | 1.0 M KOH   | 296                                                  | 81.5                                | <i>Appl. Catal. B Environ.</i> <b>2020</b> , 279, 119394 |

**Table S7.** Comparison of overall water splitting performance of Ir<sub>3</sub>Sn<sub>7</sub>/C with Ir-based electrocatalysts reported previously in alkaline solution.

| Catalysts                          | Electrolyte | Voltage (V) | References                                               |
|------------------------------------|-------------|-------------|----------------------------------------------------------|
| Ir <sub>3</sub> Sn <sub>7</sub> /C | 1.0 M KOH   | 1.48        | This work                                                |
| Ir-Ni(OH) <sub>2</sub> /NF         | 1.0 M KOH   | 1.48        | <i>ACS Nano</i> <b>2025</b> , 19, 38849                  |
| Ir/NiPS <sub>3</sub>               | 1.0 M KOH   | 1.51        | <i>Nat. Commun.</i> <b>2024</b> , 15, 2851               |
| Ir-rEGO                            | 1.0 M KOH   | 1.50        | <i>Adv. Funct. Mater.</i> <b>2024</b> , 34, 2313530      |
| IrIn <sub>2</sub> /C               | 1.0 M KOH   | 1.53        | <i>Adv. Funct. Mater.</i> <b>2024</b> , 34, 2311683      |
| IrGa/N-rGO                         | 1.0 M KOH   | 1.51        | <i>Adv. Energy Mater.</i> <b>2023</b> , 13, 2202703      |
| Ir-NSs                             | 1.0 M KOH   | 1.575       | <i>Natl. Sci. Rev.</i> <b>2020</b> , 7, 1340             |
| Ir <sub>1</sub> @Co/NC             | 1.0 M KOH   | 1.60        | <i>Angew. Chem. Int. Ed.</i> <b>2019</b> , 58, 11868     |
| D-IrTe <sub>2</sub>                | 1.0 M KOH   | 1.56        | <i>Adv. Funct. Mater.</i> <b>2020</b> , 30, 2004375      |
| BP-Ir                              | 1.0 M KOH   | 1.54        | <i>Adv. Mater.</i> <b>2021</b> , 33, 2104638             |
| Li-IrSe                            | 1.0 M KOH   | 1.48        | <i>Angew. Chem. Int. Ed.</i> <b>2019</b> , 58, 14764     |
| d-ZnIr(OH) <sub>6</sub> NSs/C      | 1.0 M KOH   | 1.48        | <i>Energy Environ. Sci.</i> <b>2022</b> , 15, 1672       |
| Ir/MoS <sub>2</sub>                | 1.0 M KOH   | 1.57        | <i>ACS Energy Lett.</i> <b>2019</b> , 4, 368             |
| RuIrO <sub>x</sub>                 | 1.0 M KOH   | 1.47        | <i>Nat. Commun.</i> <b>2019</b> , 10, 4875               |
| Ir-NR/C                            | 1.0 M KOH   | 1.57        | <i>Appl. Catal. B Environ.</i> <b>2020</b> , 279, 119394 |
| NiVIr-LDH                          | 1.0 M KOH   | 1.52        | <i>Nat. Commun.</i> <b>2019</b> , 10, 3899               |

**Table S8.** Concentrations of Ir and Sn ions leached from the Ir<sub>3</sub>Sn<sub>7</sub>/C catalyst into the

| Elements             | Sn  | Ir  |
|----------------------|-----|-----|
| Concentrations (ppb) | 2.8 | 1.0 |

electrolyte over 140 h of overall water splitting.



**Table S9.** Comparison of AEM water electrolyzer performance of Ir<sub>3</sub>Sn<sub>7</sub>/C with those of recently reported electrocatalysts.

| Catalysts                                                                             | Cell voltage (V)             | Stability test (h)          | Testing condition | References                                          |
|---------------------------------------------------------------------------------------|------------------------------|-----------------------------|-------------------|-----------------------------------------------------|
| Ir <sub>3</sub> Sn <sub>7</sub> /C  Ir <sub>3</sub> Sn <sub>7</sub> /C                | 1.77@1 A cm <sup>-2</sup>    | 200@1 A cm <sup>-2</sup>    | 1.0 M KOH, 50 °C  | This work                                           |
| Ni <sub>3</sub> S <sub>2</sub> /Cr <sub>2</sub> S <sub>3</sub> @NF  Ni FeCr-LDH@NF    | 2.04@1 A cm <sup>-2</sup>    | 35@1 A cm <sup>-2</sup>     | 1.0 M KOH, 60 °C  | <i>J. Am. Chem. Soc.</i> <b>2022</b> , 144, 6028    |
| Pt <sub>1</sub> /CoHPO  Ti felt                                                       | 1.8@1 A cm <sup>-2</sup>     | 100@1 A cm <sup>-2</sup>    | 0.1 M KOH, 80 °C  | <i>Nat. Commun.</i> <b>2022</b> , 13, 3822          |
| d-(Fe,Ni)OOH  NiMoN                                                                   | 1.55@500 mA cm <sup>-2</sup> | 200@375 mA cm <sup>-2</sup> | 6 M KOH, 60 °C    | <i>Adv. Mater.</i> <b>2023</b> , 35, 2306097        |
| MoO <sub>2</sub> @Ru  NiFe LDH@NF                                                     | 1.78@1 A cm <sup>-2</sup>    | 200@1 A cm <sup>-2</sup>    | 1.0 M KOH, 50 °C  | <i>Adv. Energy Mater.</i> <b>2023</b> , 2301492     |
| Ni <sub>3</sub> N/Ni  NiFe <sub>2</sub> O <sub>4</sub>                                | 1.88@500 mA cm <sup>-2</sup> | 24@500 mA cm <sup>-2</sup>  | 1.0 M KOH, 55 °C  | <i>Energy Environ. Sci.</i> <b>2022</b> , 15, 185   |
| (Ni, Fe) <sub>3</sub> S <sub>2</sub> /NFF   (Ni, Fe) <sub>3</sub> S <sub>2</sub> /NFF | 1.90@300 mA cm <sup>-2</sup> | 400@400 mA cm <sup>-2</sup> | 0.5 M KOH         | <i>Adv. Funct. Mater.</i> <b>2024</b> , 2400979     |
| Ir@Zr-CoP  NiFe-LDH                                                                   | 1.88@1 A cm <sup>-2</sup>    | 150@1 A cm <sup>-2</sup>    | 1.0 M KOH         | <i>Adv. Energy Mater.</i> <b>2023</b> , 13, 2301841 |
| PtPd-HEA  NiFe-LDH                                                                    | 1.81@1 A cm <sup>-2</sup>    | 100@1 A cm <sup>-2</sup>    | 1.0 M KOH, 80 °C  | <i>ACS Catal.</i> <b>2025</b> , 15, 11022           |
| Pt SACs-NiCrO <sub>3</sub> /NF  NiFeO <sub>x</sub> H <sub>y</sub> /NF                 | 1.51@100 mA cm <sup>-2</sup> | 100@100 mA cm <sup>-2</sup> | 1.0 M KOH         | <i>Adv. Funct. Mater.</i> <b>2025</b> , 35, 2416678 |
| JH-Pt <sub>2</sub> Tb/C  NiFe-LDH                                                     | 1.79 V@1 A cm <sup>-2</sup>  | 100@1 A cm <sup>-2</sup>    | 1.0 M KOH, 80 °C  | <i>Adv. Mater.</i> <b>2025</b> , 37, 2506936        |
| Ru As/WCx  NiFeOH <sub>x</sub> -NF                                                    | 1.79@1 A cm <sup>-2</sup>    | 190@1 A cm <sup>-2</sup>    | 1.0 M KOH, 80 °C  | <i>J. Am. Chem. Soc.</i> <b>2024</b> , 146, 4883    |
| Pt <sub>SA</sub> -Mn  Fe-Ni LDHs                                                      | 1.97@1 A cm <sup>-2</sup>    | 600@500 mA cm <sup>-2</sup> | 1.0 M KOH, 60 °C  | <i>ACS Nano</i> <b>2024</b> , 18, 16222             |
| Ni <sub>3</sub> Mo  Ni-FeLDH                                                          | 1.82@1 A cm <sup>-2</sup>    | 48@1 A cm <sup>-2</sup>     | 1.0 M KOH         | <i>ACS Catal.</i> <b>2023</b> , 13, 11589           |
| UP-RuNiSAs/C  NiFeO <sub>x</sub>                                                      | 1.95@1 A cm <sup>-2</sup>    | 250@1.0 A cm <sup>-2</sup>  | 1.0 M KOH, 70 °C  | <i>Nat. Commun.</i> <b>2024</b> , 15, 2218          |
| P-Os/NiFe  RuO <sub>2</sub> /NiFe                                                     | 2.02 V@1 A cm <sup>-2</sup>  | 500@100 mA cm <sup>-2</sup> | 1.0 M KOH, 60 °C  | <i>Adv. Funct. Mater.</i> <b>2024</b> , 34, 2408517 |

**Table S10.** Comparison of PEM water electrolyzer performance of Ir<sub>3</sub>Sn<sub>7</sub>/C with those of recently reported electrocatalysts.

| Catalysts                                                              | Cell voltage (V)              | Stability test (h)           | Testing condition                    | References                                                |
|------------------------------------------------------------------------|-------------------------------|------------------------------|--------------------------------------|-----------------------------------------------------------|
| Ir <sub>3</sub> Sn <sub>7</sub> /C  Ir <sub>3</sub> Sn <sub>7</sub> /C | 1.82@1 A cm <sup>-2</sup>     | 100@500 mA cm <sup>-2</sup>  | 0.5 M H <sub>2</sub> SO <sub>4</sub> | This work                                                 |
| Ni-RuO <sub>2</sub>   Pt/C                                             | 1.95@1 A cm <sup>-2</sup>     | 1000@200 mA cm <sup>-2</sup> | 0.5 M H <sub>2</sub> SO <sub>4</sub> | <i>Nat. Mater.</i> <b>2023</b> , 22, 100                  |
| RuFe/CF  Pt/C                                                          | 1.898@1 A cm <sup>-2</sup>    | 250@200 mA cm <sup>-2</sup>  | 0.5 M H <sub>2</sub> SO <sub>4</sub> | <i>Adv. Mater.</i> <b>2024</b> , 36, 2312369              |
| Ir <sub>3</sub> Ni NCs/C  Ir <sub>3</sub> Ni NCs/C                     | 1.77@0.5 A cm <sup>-2</sup>   | 190@100 mA cm <sup>-2</sup>  | 0.2 M HClO <sub>4</sub>              | <i>J. Am. Chem. Soc.</i> <b>2024</b> , 146, 7858          |
| Pt/C  IrO <sub>2</sub>                                                 | 2.43@1 A cm <sup>-2</sup>     | -                            | 0.5 M H <sub>2</sub> SO <sub>4</sub> | <i>Adv. Mater.</i> <b>2025</b> , 37, 2420159              |
| RuMnFeMoCo@C F  Pt/C                                                   | 1.85@1 A cm <sup>-2</sup>     | 150@500 mA cm <sup>-2</sup>  | 0.5 M H <sub>2</sub> SO <sub>4</sub> | <i>Angew. Chem. Int. Ed.</i> <b>2025</b> , 64, e202503330 |
| La-RuO <sub>2</sub>   Pt/C                                             | 1.82@1 A cm <sup>-2</sup>     | 120@100 mA cm <sup>-2</sup>  | 0.5 M H <sub>2</sub> SO <sub>4</sub> | <i>Angew. Chem. Int. Ed.</i> <b>2025</b> , 64, e202425569 |
| RuO <sub>2</sub> -com  Pt/C                                            | 1.82@1 A cm <sup>-2</sup>     | 75@500 mA cm <sup>-2</sup>   | 0.5 M H <sub>2</sub> SO <sub>4</sub> | <i>ACS Nano</i> <b>2025</b> , 19, 8773                    |
| TS-Ir/MnO <sub>2</sub>   Pt/Ti                                         | 1.75@500 mA cm <sup>-2</sup>  | 200@500 mA cm <sup>-2</sup>  | 0.2 M HClO <sub>4</sub>              | <i>Nat. Commun.</i> <b>2024</b> , 15, 95                  |
| Ir@Sr-p-TiO <sub>2</sub>   Ir@Sr-p-TiO <sub>2</sub>                    | 1.8@20 mA cm <sup>-2</sup>    | 150@20 mA cm <sup>-2</sup>   | 0.5 M H <sub>2</sub> SO <sub>4</sub> | <i>Adv. Energy Mater.</i> <b>2024</b> , 14, 2303987       |
| PtRu-Co <sub>3</sub> O <sub>4</sub>   Pt/C                             | 1.83@1 A cm <sup>-2</sup>     | 200@200 mA cm <sup>-2</sup>  | 0.5 M H <sub>2</sub> SO <sub>4</sub> | <i>J. Am. Chem. Soc.</i> <b>2024</b> , 146, 28728         |
| NdMn <sub>1.5</sub> Ru <sub>0.5</sub> O  Pt/C                          | 1.97@500 mA cm <sup>-2</sup>  | 100@500 mA cm <sup>-2</sup>  | 0.5 M H <sub>2</sub> SO <sub>4</sub> | <i>J. Power Sources</i> <b>2024</b> , 604, 234416         |
| Co <sub>3</sub> O <sub>4</sub> /MnO <sub>2</sub>   Pt/C                | 1.638@100 mA cm <sup>-2</sup> | -                            | 0.5 M H <sub>2</sub> SO <sub>4</sub> | <i>Energy Environ. Sci.</i> <b>2024</b> , 17, 5972        |
| RuO <sub>2</sub> -com  Pt/C                                            | 2.15@1 A cm <sup>-2</sup>     | -                            | 0.5 M H <sub>2</sub> SO <sub>4</sub> | <i>Nat. Commun.</i> <b>2025</b> , 16, 337                 |
| M-RuIrFeCoNiO <sub>2</sub>   Pt/C                                      | 1.85@1 A cm <sup>-2</sup>     | 500@1 A cm <sup>-2</sup>     | 0.5 M H <sub>2</sub> SO <sub>4</sub> | <i>Sci. Adv.</i> <b>2023</b> , 9, ead9144                 |

1. G. Kresse and J. Furthmüller, *Phys. Rev. B*, 1996, **54**, 11169-11186.
2. G. Kresse and J. Hafner, *Phys. Rev. B*, 1993, **47**, 558-561.
3. B. Hammer, L. B. Hansen and J. K. Nørskov, *Phys. Rev. B*, 1999, **59**, 7413-7421.
4. J. P. Perdew, K. Burke and M. Ernzerhof, *Phys. Rev. Lett.*, 1996, **77**, 3865-3868.
5. P. E. Blochl, *Phys. Rev. B* 1994, **50**, 17953-17979.
6. J. Klimeš, D. R. Bowler and A. Michaelides, *Phys. Rev. B* 2011, **83**, 195131.
7. S. Grimme, J. Antony, S. Ehrlich and H. Krieg, *J. Chem. Phys.*, 2010, **132**, 154104.
8. L.-P. Ji, F. Yi, C.-Q. Cheng, Z. Li, W. Guan, B. He, Z. Liu, J. Mao, S.-J. Zheng, C.-K. Dong, Y.-Y. Zhang, H. Liu, L. Cui and X.-W. Du, *Small*, 2022, **18**, 2107481.
